# Supplementary material for: Efficient and recyclable copper-based MOF-catalyzed N-arylation of N-containing heterocycles with aryliodides
Source: Royal Society of Chemistry journal article supplement (doi:10.1039/c6ob02068b), 2016-01-01

## Electronic Supplementary Information

### Efficient and recyclable copper-based MOFs-catalyzed *N*-arylation of *N*-containing heterocycles with aryl iodides

Zihao Li,<sup>a</sup> Fei Meng,<sup>b</sup> Jie Zhang,<sup>a</sup> Jianwei Xie<sup>a,\*</sup> and Bin Dai<sup>a</sup>

<sup>a</sup>School of Chemistry and Chemical Engineering/The Key Laboratory for Green Processing of Chemical Engineering of Xinjiang Bingtuan, Shihezi University, Shihezi, Xinjiang 832003, China

<sup>b</sup>Guangdong Bioengineering Institute, Guangdong Academy of Science, Guangzhou 510316, China

\* Corresponding author. E-mail: cesxjw@foxmail.com; Tel.: +86-993-2057213; Fax: +86-993-2057270

### Table of Contents

|                                                                                                       |    |
|-------------------------------------------------------------------------------------------------------|----|
| 1. General methods .....                                                                              | 2  |
| 2. Synthesis and the characterization of MOF-199 .....                                                | 2  |
| 3. General procedure for MOF-199 catalyzed <i>N</i> -arylation of heterocycles with aryl iodides..... | 3  |
| 4. Recycling of the catalyst MOF-199.....                                                             | 4  |
| 5. The NMR spectra data of the products.....                                                          | 5  |
| 6. Copies of <sup>1</sup> H NMR and <sup>13</sup> C NMR spectra .....                                 | 15 |

## 1. General methods

All the reactions were carried out under air using magnetic stirring unless otherwise noted.  $^1\text{H}$  NMR spectral and  $^{13}\text{C}$  NMR were recorded on a Bruker Advance III HD 400 instrument using TMS as internal standard and  $\text{CDCl}_3$  as solvent. Mass spectra were recorded on GC-MS (Agilent 7890A/5975C) instrument under EI model. Column chromatography was performed with silica gel (200-300 mesh) purchased from Qingdao Haiyang Chemical Co., Ltd. All the other reagents were of analytical grade quality, purchased commercially and used as received.

## 2. Synthesis and the characterization of MOF-199

Benzene-1,3,5-tricarboxylic acid (4.91 g, 0.0234 mol) was dissolved into ethanol (25 ml), and  $\text{Cu}(\text{NO}_3)_2 \cdot 2.5\text{H}_2\text{O}$  (10.86 g, 0.0466 mol) was dissolved into water (25 ml). The two solutions were mixed at ambient temperature for 30 min, and the mixture was transferred into an autoclave. The autoclave was heated at temperature 383 K, under hydrothermal conditions for 18 h. The reaction vessel was cooled to ambient temperature, and blue crystals of MOF-199 were isolated by filtration, and washed with water. The product was dried at 383 K overnight. The yield was quantitative (8 g).<sup>[12]</sup>

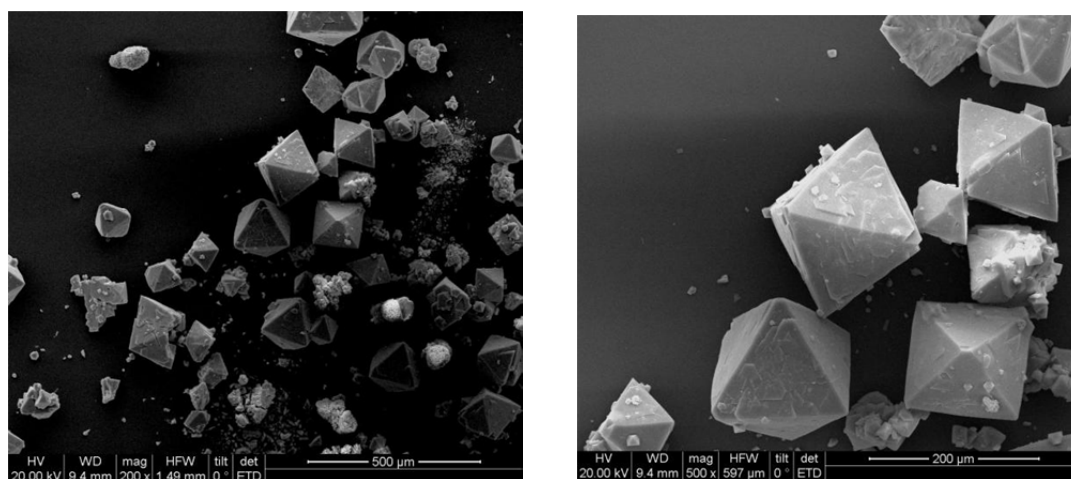

Scheme 1. SEM images of MOF-199

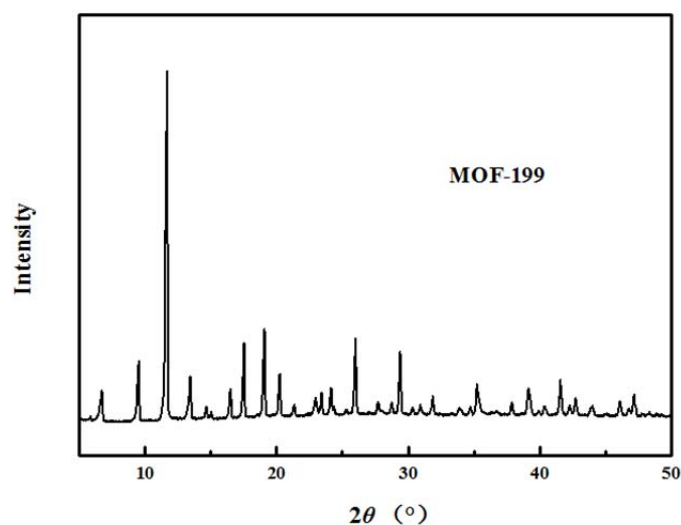

Scheme 2. XRD pattern of MOF-199

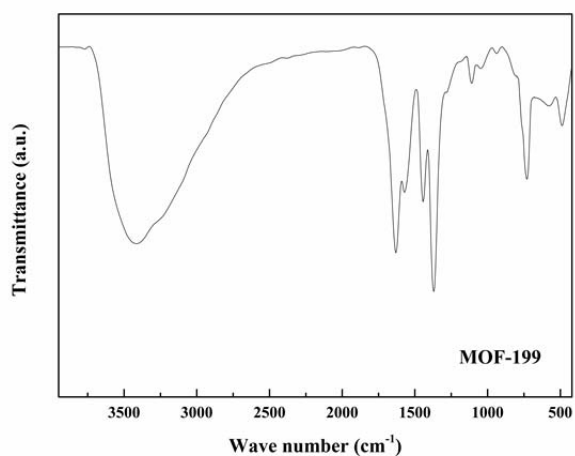

Scheme 3. IR spectrogram of the MOF-199.

### 3. General procedure for MOF-199 catalyzed *N*-arylation of heterocycles with aryl iodides

To a 10 mL of sealed tube was added MOF-199 (0.05 mmol), aryl halides (0.50 mmol), *N*-containing heterocycles (0.75 mmol), NaOH (1.0 mmol) and DMSO (1 mL). The reaction mixture was reacted at 120 °C in a preheated oil bath for 12 h. The reaction mixture was cooled to room temperature, extracted with ethyl acetate (20 mL×3). The combined organic phases was washed with water and brine, dried over anhydrous Na<sub>2</sub>SO<sub>4</sub>, and concentrated in *vacuo*. The residue was purified by flash column chromatograph on silica gel (ethyl acetate/petroleum ether as the eluent) to

afford the target product **3a-3z**.

#### **4. Recycling of the catalyst MOF-199**

After completion of the first run, the reaction mixture was cooled to room temperature, and the MOF-199 catalyst was separated from the reaction mixture by simple centrifugation, washed with copious amounts of H<sub>2</sub>O, ethyl acetate and ethyl alcohol, and dried 100 °C under vacuum in 6 h. The recovered MOF-199 catalyst was then reused as catalyst in further transformation under identical conditions. The process was then repeated.

## 5. The NMR spectra data of the products

### 1-(*p*-Tolyl)-1*H*-pyrrole (3a) <sup>[1]</sup>

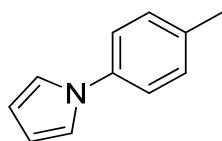

96% yield for 4-iodotoluene and 10 % for 4-bromotoluene.

<sup>1</sup>H NMR (400 MHz, CDCl<sub>3</sub>) δ: 7.30-7.34 (m, 2H), 7.25 (dd, *J* = 8.6, 0.5 Hz, 2H), 7.06-7.12 (m, 2H), 6.32-6.40 (m, 2H), 2.41 (s, 3H).

<sup>13</sup>C NMR (100 MHz, CDCl<sub>3</sub>) δ: 138.6, 135.5, 130.2, 120.7, 119.5, 110.2, 21.0.

GC-MS: *m/z* = 157 [M]<sup>+</sup>

### 1-phenyl-1*H*-pyrrole (3b) <sup>[1]</sup>

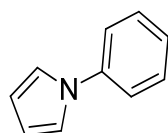

93% yield.

<sup>1</sup>H NMR (400 MHz, CDCl<sub>3</sub>): δ: 7.39-7.45 (m, 4H), 7.24-7.27 (m, 1H), 7.10 (t, *J* = 2.2 Hz, 2H), 6.36 (t, *J* = 2.2 Hz, 2H).

<sup>13</sup>C NMR (100 MHz, CDCl<sub>3</sub>) δ: 140.9, 129.7, 125.8, 120.7, 119.5, 110.5.

GC-MS: *m/z* = 143 [M]<sup>+</sup>

### 1-(4-Methoxyphenyl)-1*H*-pyrrole (3c) <sup>[1]</sup>

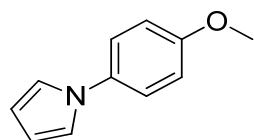

97% yield.

<sup>1</sup>H NMR (400 MHz, CDCl<sub>3</sub>) δ: 7.32-7.34 (m, 1H), 7.30-7.31 (m, 1H), 7.01 (t, *J* = 2.2 Hz, 2H), 6.96-6.97 (m, 1H), 6.93-6.95 (m, 1H), 6.33 (t, *J* = 2.2 Hz, 2H), 3.84 (s, 3H).

<sup>13</sup>C NMR (100 MHz, CDCl<sub>3</sub>) δ: 157.8, 134.6, 122.3, 119.8, 114.8, 110.0, 55.7.

GC-MS (*m/z*):173 [M]<sup>+</sup>

**1-([1,1'-Biphenyl]-4-yl)-1*H*-pyrrole (3d)**<sup>[3]</sup>

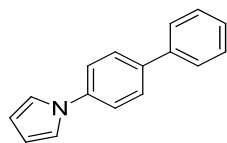

95% yield.

<sup>1</sup>H NMR (400 MHz, CDCl<sub>3</sub>) δ: 7.60-7.67 (m, 4H), 7.47 (t, *J* = 8.0 Hz, 4H), 7.37 (t, *J* = 8.0 Hz, 1H), 7.15 (td, *J* = 2.2, 0.7 Hz, 2H), 6.38-6.39 (m, 2H).

<sup>13</sup>C NMR (100 MHz, CDCl<sub>3</sub>) δ: 140.3, 140.1, 138.6, 129.0, 128.3, 127.5, 127.0, 120.8, 119.4, 110.7.

GC-MS (m/z):219 [M]<sup>+</sup>

**1-(3,5-Dimethylphenyl)-1*H*-pyrrole (3e)**<sup>[4]</sup>

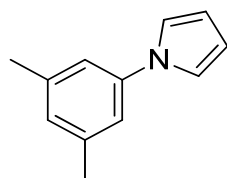

95% yield.

<sup>1</sup>H NMR (400 MHz, CDCl<sub>3</sub>) δ: 7.13 (t, *J* = 2.2 Hz, 2H), 7.08 (t, *J* = 0.5 Hz, 2H), 6.94-6.95 (m, 1H), 6.38-6.40 (m, 2H), 2.42 (s, 6H).

<sup>13</sup>C NMR (100 MHz, CDCl<sub>3</sub>) δ: 140.9, 139.4, 127.4, 119.5, 118.6, 110.2, 21.5.

GC-MS (m/z):171 [M]<sup>+</sup>

**1-(4-Chlorophenyl)-1*H*-pyrrole (3f)**<sup>[2]</sup>

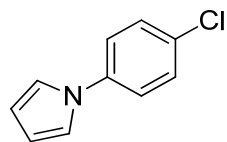

72% yield.

<sup>1</sup>H NMR (400 MHz, CDCl<sub>3</sub>) δ: 7.37-7.41 (m, 2H), 7.31-7.34 (m, 2H), 7.05 (t, *J* = 2.2 Hz, 2H), 6.36 (t, *J* = 2.2 Hz, 2H).

<sup>13</sup>C NMR (100 MHz, CDCl<sub>3</sub>) δ: 139.4, 131.2, 129.8, 121.8, 119.4, 111.0.

GC-MS (m/z):177 [M]<sup>+</sup>

### 1-phenyl-1*H*-indole (3g) <sup>[5]</sup>

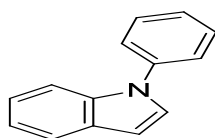

80% yield.

<sup>1</sup>H NMR (400 MHz, CDCl<sub>3</sub>) δ: 7.75-7.78 (m, 1H), 7.62-7.66 (m, 1H), 7.57 (dd, *J* = 4.2, 0.6 Hz, 4H), 7.40-7.43 (m, 2H), 7.22-7.30 (m, 2H), 6.76 (dt, *J* = 3.2, 1.0 Hz, 1H).

<sup>13</sup>C NMR (100 MHz, CDCl<sub>3</sub>) δ: 140.0, 136.0, 129.7, 129.4, 128.1, 126.6, 124.5, 122.5, 121.2, 120.5, 110.6, 103.7.

GC-MS (m/z):193 [M]<sup>+</sup>

### 1-(*p*-Tolyl)-1*H*-indole (3h) <sup>[5]</sup>

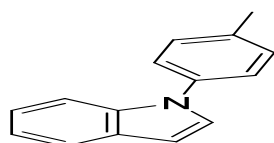

79% yield for 4-iodotoluene and 15 % for 4-bromotoluene.

<sup>1</sup>H NMR (400 MHz, CDCl<sub>3</sub>) δ 7.73 (d, *J* = 7.6 Hz, 1H), 7.58 (d, *J* = 8.4 Hz, 1H), 7.43 (d, *J* = 8.0 Hz, 2H), 7.34-7.36 (m, 3H), 7.19-7.28 (m, 2H), 6.71-6.72 (m, 1H), 2.47 (s, 3H).

<sup>13</sup>C NMR (100 MHz, CDCl<sub>3</sub>) δ: 137.4, 136.4, 136.1, 130.3, 129.3, 128.2, 124.4, 122.3, 121.2, 120.3, 110.6, 103.3, 21.2.

GC-MS (m/z):207 [M]<sup>+</sup>

### 1-(4-Methoxyphenyl)-1*H*-indole (3i) <sup>[5]</sup>

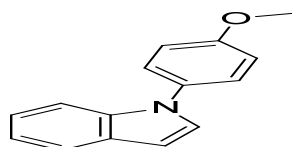

87% yield.

<sup>1</sup>H NMR (400 MHz, CDCl<sub>3</sub>) δ: 7.69 (d, *J* = 7.6 Hz, 1H), 7.46 (d, *J* = 8.0 Hz, 1H), 7.37 (d, *J* = 8.8 Hz, 2H), 7.16-7.26 (m, 3H), 7.00 (d, *J* = 8.8 Hz, 2H), 6.65-6.66 (m, 1H), 3.83 (s, 3H).

$^{13}\text{C}$  NMR (100 MHz,  $\text{CDCl}_3$ )  $\delta$ : 158.3, 136.4, 132.9, 129.1, 128.4, 126.0, 122.2, 121.1, 120.2, 114.8, 110.5, 103.0, 55.7.

GC-MS (m/z):223  $[\text{M}]^+$

**1-(4-Chlorophenyl)-1H-indole (3j)**<sup>[6]</sup>

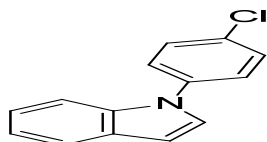

84% yield.

$^1\text{H}$  NMR (400 MHz,  $\text{CDCl}_3$ )  $\delta$ : 7.79 (d,  $J = 8.4$  Hz, 1H), 7.60 (dd,  $J = 8.4, 0.8$  Hz, 1H), 7.47-7.55 (m, 4H), 7.26-7.36 (m, 3H), 6.78 (dd,  $J = 3.2, 0.8$  Hz, 1H).

$^{13}\text{C}$  NMR (100 MHz,  $\text{CDCl}_3$ )  $\delta$ : 138.4, 135.8, 132.0, 129.9, 129.4, 127.8, 125.6, 122.7, 121.4, 120.7, 110.4, 104.2.

GC-MS (m/z):227  $[\text{M}]^+$

**1-(4-Nitrophenyl)-1H-indole (3k)**<sup>[5]</sup>

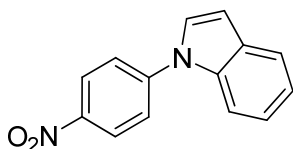

50% yield.

$^1\text{H}$  NMR (400 MHz,  $\text{CDCl}_3$ )  $\delta$ : 8.41 (d,  $J = 9.2$  Hz, 2H), 7.65-7.72 (m, 4H), 7.39 (d,  $J = 3.6$  Hz, 1H), 7.22-7.32 (m, 2H), 6.78 (dd,  $J = 3.6, 0.8$  Hz, 1H).

$^{13}\text{C}$  NMR (100 MHz,  $\text{CDCl}_3$ )  $\delta$ : 145.3, 145.1, 135.3, 130.2, 127.2, 125.6, 123.5, 123.4, 121.8, 121.7, 110.6, 106.3.

GC-MS (m/z):238  $[\text{M}]^+$

**1-([1,1'-Biphenyl]-4-yl)-1H-indole (3l)**<sup>[5]</sup>

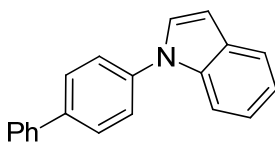

82% yield.



$^1\text{H}$  NMR (400 MHz,  $\text{CDCl}_3$ )  $\delta$ : 7.58-7.76 (m, 8H), 7.50 (t,  $J = 7.6$  Hz, 2H), 7.38-7.42 (m, 2H), 7.18-7.28 (m, 2H), 6.72 (dd,  $J = 3.2, 0.8$  Hz, 1H).

$^{13}\text{C}$  NMR (100 MHz,  $\text{CDCl}_3$ )  $\delta$ : 140.3, 139.4, 139.1, 135.9, 129.5, 129.0, 128.3, 128.0, 127.6, 127.2, 124.6, 122.6, 121.3, 120.6, 110.7, 103.9.

GC-MS (m/z): 269  $[\text{M}]^+$

### 5-methoxy-1-(*p*-Tolyl)-1*H*-indole (3m) <sup>[5]</sup>

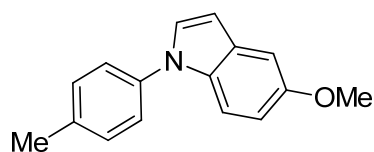

92% yield.

$^1\text{H}$  NMR (400 MHz,  $\text{CDCl}_3$ )  $\delta$ : 7.53-7.58 (m, 1H), 7.44-7.46 (m, 2H), 7.36-7.39 (m, 3H), 7.25-7.28 (m, 1H), 6.99-7.03 (m, 1H), 6.69-6.72 (m, 1H), 3.97 (s, 3H), 2.51 (s, 3H).

$^{13}\text{C}$  NMR (100 MHz,  $\text{CDCl}_3$ )  $\delta$ : 154.6, 137.5, 136.1, 131.3, 130.2, 129.8, 128.5, 124.0, 112.4, 111.4, 103.0, 102.7, 55.9, 21.1.

GC-MS (m/z): 237  $[\text{M}]^+$

### 5-bromo-1-(*p*-Tolyl)-1*H*-indole (3n) <sup>[7]</sup>

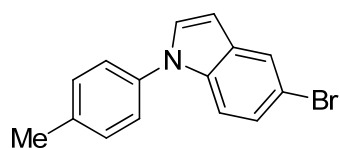

66% yield.

$^1\text{H}$  NMR (400 MHz,  $\text{CDCl}_3$ )  $\delta$ : 7.84 (d,  $J = 2.0$  Hz, 1H), 7.41 (d,  $J = 8.8$  Hz, 1H), 7.30-7.38 (m, 6H), 6.63 (dd,  $J = 3.2, 0.4$  Hz, 1H), 2.47 (s, 3H).

$^{13}\text{C}$  NMR (100 MHz,  $\text{CDCl}_3$ )  $\delta$ : 136.9, 134.8, 130.9, 130.4, 129.3, 125.1, 124.4, 123.6, 113.5, 112.1, 102.8, 100.0, 21.2.

GC-MS (m/z): 286  $[\text{M}]^+$

### 1-phenyl-1*H*-1,2,4-triazole (3o) <sup>[8]</sup>

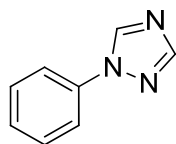

92% yield.

$^1\text{H}$  NMR (400 MHz,  $\text{CDCl}_3$ )  $\delta$ : 8.55 (s, 1H), 8.09 (s, 1H), 7.66 (d,  $J = 8.0$  Hz, 2H), 7.49 (t,  $J = 7.8$  Hz, 2H), 7.38 (t,  $J = 7.2$  Hz, 1H).

$^{13}\text{C}$  NMR (100 MHz,  $\text{CDCl}_3$ )  $\delta$ : 152.6, 140.9, 137.0, 129.8, 128.3, 120.1.

GC-MS (m/z): 145  $[\text{M}]^+$

### 1-(*p*-Tolyl)-1H-1,2,4-triazole (3p)<sup>[8]</sup>

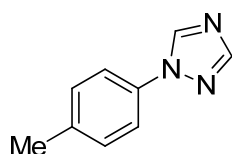

67% yield for 4-iodotoluene and 13 % for 4-bromotoluene.

$^1\text{H}$  NMR (400 MHz,  $\text{CDCl}_3$ )  $\delta$ : 8.50 (s, 1H), 8.08 (s, 1H), 7.52-7.56 (m, 2H), 7.29 (d,  $J = 8.4$  Hz, 2H), 2.40 (s, 3H).

$^{13}\text{C}$  NMR (100 MHz,  $\text{CDCl}_3$ )  $\delta$ : 152.5, 140.9, 138.4, 134.8, 130.4, 120.2, 21.2.

GC-MS (m/z): 159  $[\text{M}]^+$

### 1-(4-Methoxyphenyl)-1H-1,2,4-triazole (3q)<sup>[9]</sup>

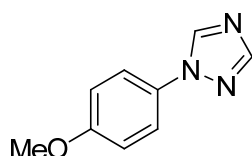

83% yield.

$^1\text{H}$  NMR (400 MHz,  $\text{CDCl}_3$ )  $\delta$ : 8.63 (s, 1H), 8.11 (s, 1H), 7.59 (d,  $J = 8.8$  Hz, 2H), 7.01 (d,  $J = 9.2$  Hz, 2H), 3.86 (s, 3H).

$^{13}\text{C}$  NMR (100 MHz,  $\text{CDCl}_3$ )  $\delta$ : 159.7, 151.9, 140.8, 130.4, 122.0, 115.0, 55.8.

GC-MS (m/z): 175  $[\text{M}]^+$

### 1-(3,5-Dimethylphenyl)-1H-1,2,4-triazole (3r)

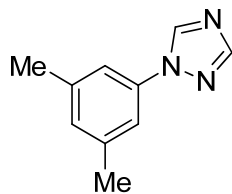

73% yield.

$^1\text{H}$  NMR (400 MHz,  $\text{CDCl}_3$ )  $\delta$ : 8.49 (s, 1H), 8.04 (t,  $J = 2.2$  Hz, 1H), 7.24-7.25 (m, 2H), 6.98 (s, 1H), 2.34 (s, 6H).

$^{13}\text{C}$  NMR (100 MHz,  $\text{CDCl}_3$ )  $\delta$ : 152.2, 140.8, 139.6, 136.8, 129.7, 117.7, 21.2.

GC-MS (m/z): 173  $[\text{M}]^+$

### 1-(4-Chlorophenyl)-1H-1,2,4-triazole (3s)<sup>[9]</sup>

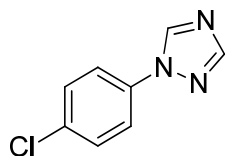

90% yield.

$^1\text{H}$  NMR (400 MHz,  $\text{CDCl}_3$ )  $\delta$ : 8.54 (s, 1H), 8.10 (s, 1H), 7.61-7.65 (m, 2H), 7.46-7.50 (m, 2H).

$^{13}\text{C}$  NMR (100 MHz,  $\text{CDCl}_3$ )  $\delta$ : 152.9, 140.9, 135.6, 134.0, 130.0, 121.3.

GC-MS (m/z): 179  $[\text{M}]^+$

### 1-(4-Nitrophenyl)-1H-1,2,4-triazole (3t)<sup>[8]</sup>

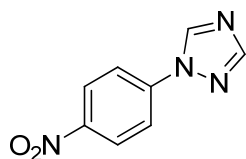

56% yield.

$^1\text{H}$  NMR (400 MHz,  $\text{CDCl}_3$ )  $\delta$ : 8.72 (s, 1H), 8.37-8.41 (m, 2H), 8.15 (s, 1H), 7.90-7.94 (m, 2H).

$^{13}\text{C}$  NMR (100 MHz,  $\text{CDCl}_3$ )  $\delta$ : 153.6, 146.9, 141.4, 135.3, 125.7, 120.0.

GC-MS (m/z): 190  $[\text{M}]^+$

### 1-([1,1'-Biphenyl]-4-yl)-1H-1,2,4-triazole (3u)<sup>[10]</sup>

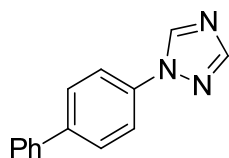

94% yield.

$^1\text{H}$  NMR (400 MHz,  $\text{CDCl}_3$ )  $\delta$ : 8.60 (s, 1H), 8.13 (s, 1H), 7.72-7.77 (m, 4H), 7.60-7.63 (m, 2H), 7.46-7.50 (m, 2H), 7.37-7.42 (m, 1H).

$^{13}\text{C}$  NMR (100 MHz,  $\text{CDCl}_3$ )  $\delta$ : 152.8, 141.4, 141.0, 139.8, 136.2, 129.1, 128.5, 128.0, 127.2, 120.5.

GC-MS (m/z):221  $[\text{M}]^+$

### 1-(4-(1H-1,2,4-Triazol-1-yl)phenyl)ethanone (3v)<sup>[11]</sup>

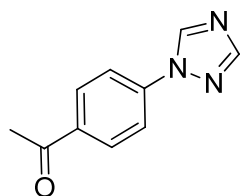

50% yield.

$^1\text{H}$  NMR (400 MHz,  $\text{CDCl}_3$ )  $\delta$ : 8.66 (s, 1H), 8.14 (s, 1H), 8.09-8.13 (m, 2H), 7.80-7.83 (m, 2H), 2.64 (s, 3H).

$^{13}\text{C}$  NMR (100 MHz,  $\text{CDCl}_3$ )  $\delta$ : 196.6, 153.2, 141.2, 140.2, 136.5, 130.3, 119.6, 26.8.

GC-MS (m/z):187  $[\text{M}]^+$

### 1-phenyl-1H-imidazole (3w)<sup>[21]</sup>

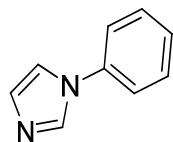

85% yield.

$^1\text{H}$  NMR (400 MHz,  $\text{DMSO}-d_6$ )  $\delta$ : 8.27 (s, 1H), 7.74 (s, 1H), 7.65 (dd,  $J = 8.6, 0.6$  Hz, 2H), 7.50 (t,  $J = 8.0$  Hz, 2H), 7.34 (t,  $J = 7.4$  Hz, 1H), 7.13 (s, 1H).

$^{13}\text{C}$  NMR (100 MHz,  $\text{DMSO}-d_6$ )  $\delta$ : 136.9, 135.5, 130.0, 129.8, 126.8, 120.3, 118.0.

GC-MS (m/z):144  $[\text{M}]^+$

### 1-(*p*-Tolyl)-1*H*-imidazole (3x) <sup>[2]</sup>

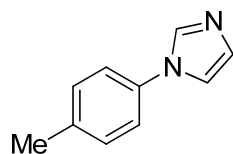

88% yield for 4-iodotoluene and 38 % for 4-bromotoluene.

<sup>1</sup>H NMR (400 MHz, DMSO-*d*<sub>6</sub>) δ: 8.21 (s, 1H), 7.69 (s, 1H), 7.52 (d, *J* = 8.4 Hz, 2H), 7.30 (d, *J* = 8.0 Hz, 2H), 7.10 (s, 1H), 2.33 (s, 3H).

<sup>13</sup>C NMR (100 MHz, DMSO-*d*<sub>6</sub>) δ: 136.2, 135.4, 134.6, 130.2, 129.7, 120.2, 118.0, 20.4.

GC-MS (m/z):158 [M]<sup>+</sup>

### 1-(4-Methoxyphenyl)-1*H*-imidazole (3y) <sup>[2]</sup>

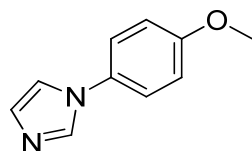

73% yield.

<sup>1</sup>H NMR (400 MHz, CDCl<sub>3</sub>) δ: 7.76 (s, 1H), 7.27-7.31 (m, 2H), 7.18 (d, *J* = 7.2 Hz, 2H), 6.95-6.99 (m, 2H), 3.84 (s, 3H).

<sup>13</sup>C NMR (100 MHz, CDCl<sub>3</sub>) δ: 159.0, 136.0, 130.8, 130.1, 123.3, 118.9, 115.0, 55.7.

GC-MS (m/z):174 [M]<sup>+</sup>

### 1-(4-Chlorophenyl)-1*H*-imidazole (3z) <sup>[2]</sup>

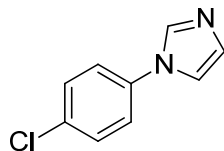

85% yield.

<sup>1</sup>H NMR (400 MHz, CDCl<sub>3</sub>) δ: 7.85 (s, 1H), 7.43 (dd, *J* = 8.8, 2.4 Hz, 2H), 7.26-7.33 (m, 4H).

<sup>13</sup>C NMR (100 MHz, DMSO-*d*<sub>6</sub>) δ: 135.8, 134.9, 131.0, 130.1, 129.7, 122.0, 118.2.

GC-MS (m/z):178 [M]<sup>+</sup>

## References

- [1] X.-X. Zhang and J.-C. Shi, *Tetrahedron Lett.*, 2011, **67**, 898.
- [2] H. Yang, C. Xi, Z. Miao and R. Chen, *Eur. J. Org. Chem.*, 2011, 3353.
- [3] G. A. Molander and L. Iannazzo, *J. Org. Chem.*, 2011, **76**, 9182.
- [4] C. C. Wu, B. Lee, P. Liao, C. S. Fang and C. W. Liu, *J. Chin. Chem. Soc.*, 2012, **59**, 480.
- [5] P. H. Patil, J. L. Nallasivam and P. R. A. Fernandes, *Asian J. Org. Chem.*, 2015, **4**, 552.
- [6] H.C. Ma and X. Z. Jiang, *J. Org. Chem.*, 2007, **72**, 8943.
- [7] N. V. Suramwar, S. R. Thakare, N. N. Karade and N. T. Khaty, *J. Mol. Catal. A: Chem.*, 2012, **359**, 28.
- [8] M. Hosseini-Sarvari and Z. Razmi, *RSC Adv.*, 2014, **4**, 44105.
- [9] R. Romagonli, P. G. Baraldi and G. Viola, *J. Med. Chem.*, 2010, **53**, 4248.
- [10] H. Chen, D. Wang, X. Wang, W. Huang, Q. Cai and K. Ding, *Synthesis.*, 2010, **9**, 1505.
- [11] L. Li, L. Zhu, D. Chen, X. Hu and R. Wang, *Eur. J. Org. Chem.*, 2011, 2962.
- [12] Q.M. Wang, D. Shen and J. Semanscin, *Micropor. Mesopor. Mat.*, 2002, **55**, 217.

## 6. Copies of $^1\text{H}$ NMR and $^{13}\text{C}$ NMR spectra

### 1-(*p*-Tolyl)-1*H*-pyrrole (3a)

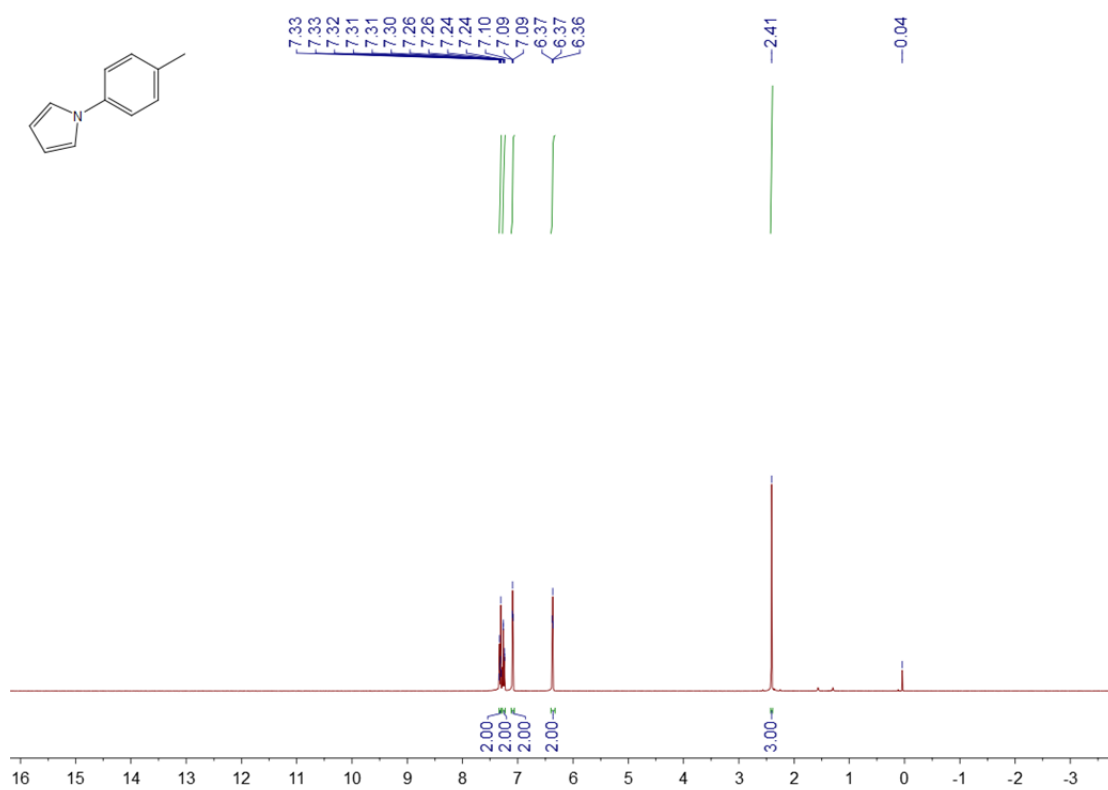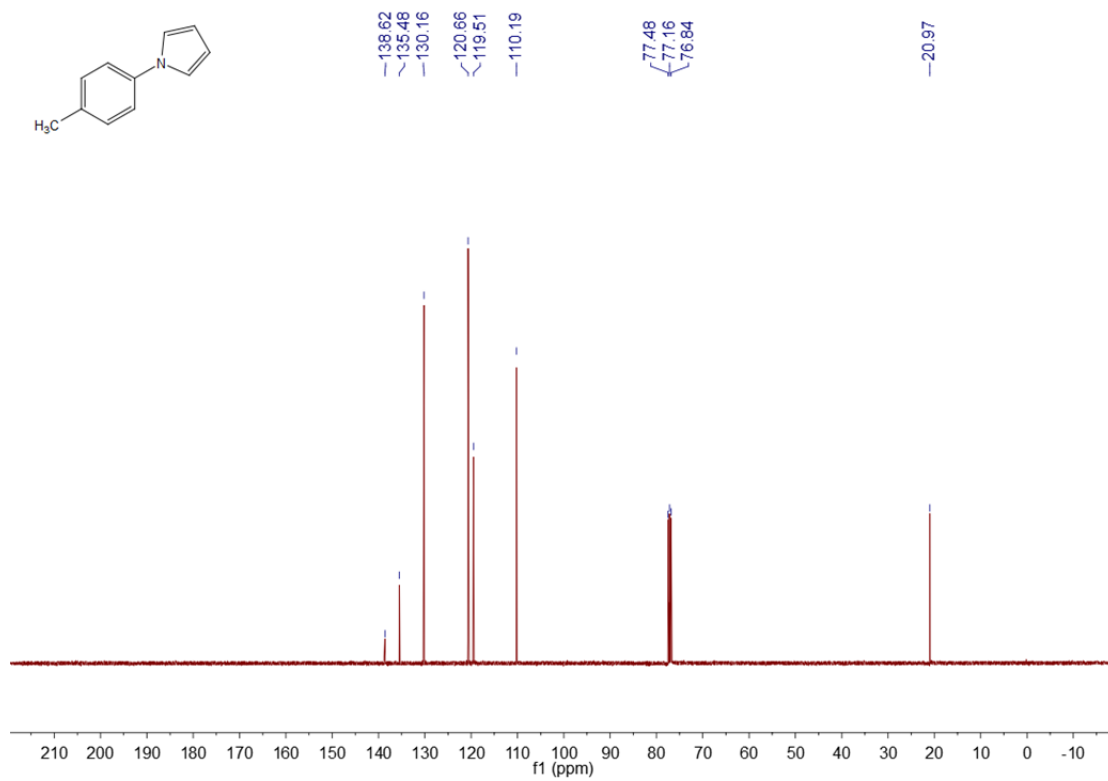

# 1-phenyl-1H-pyrrole (3b)

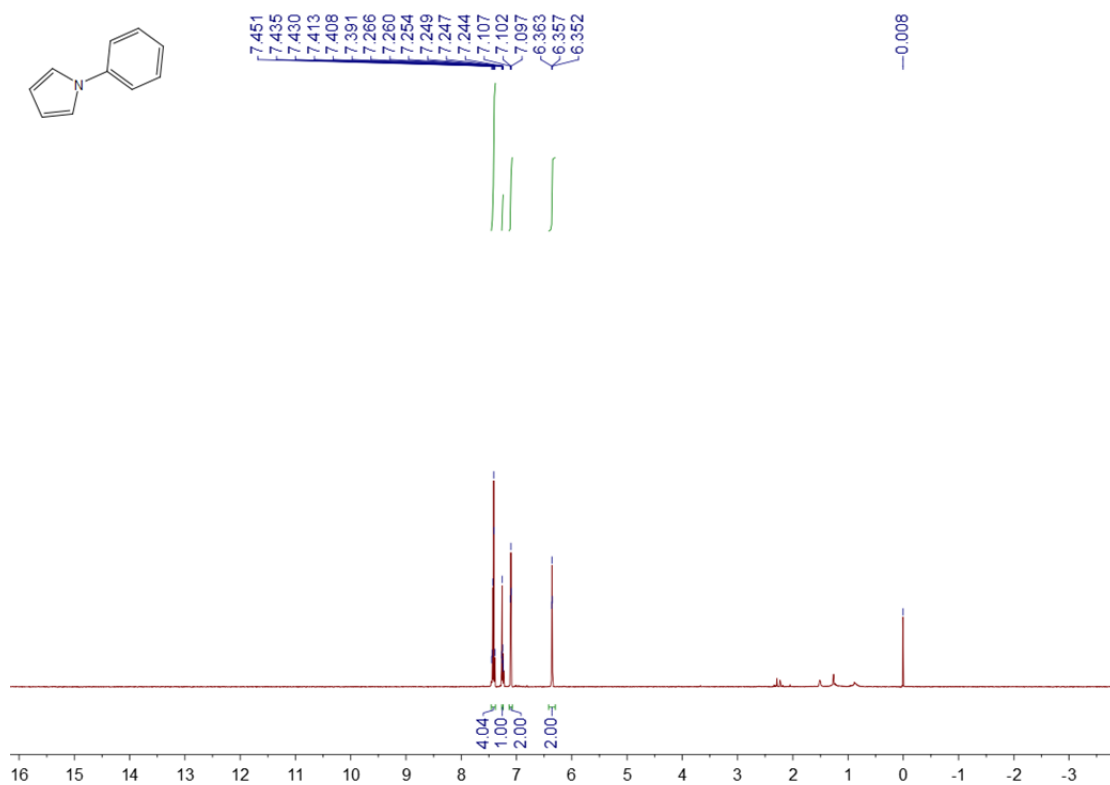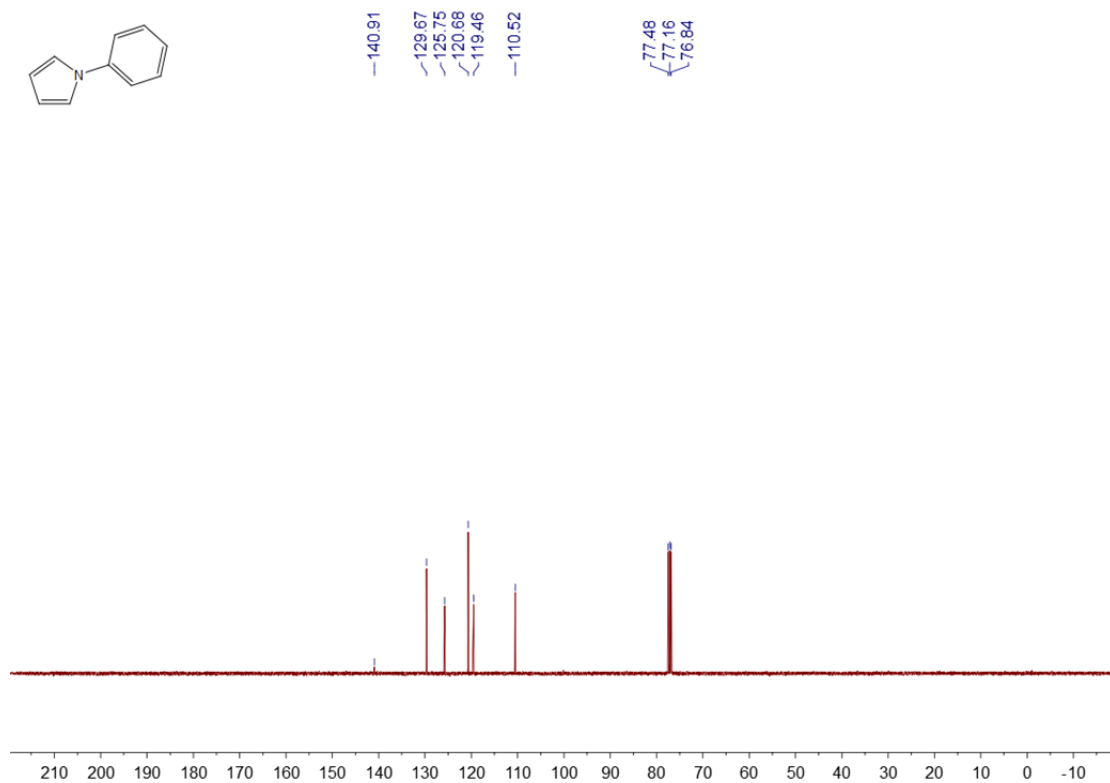



# 1-(4-Methoxyphenyl)-1H-pyrrole (3c)

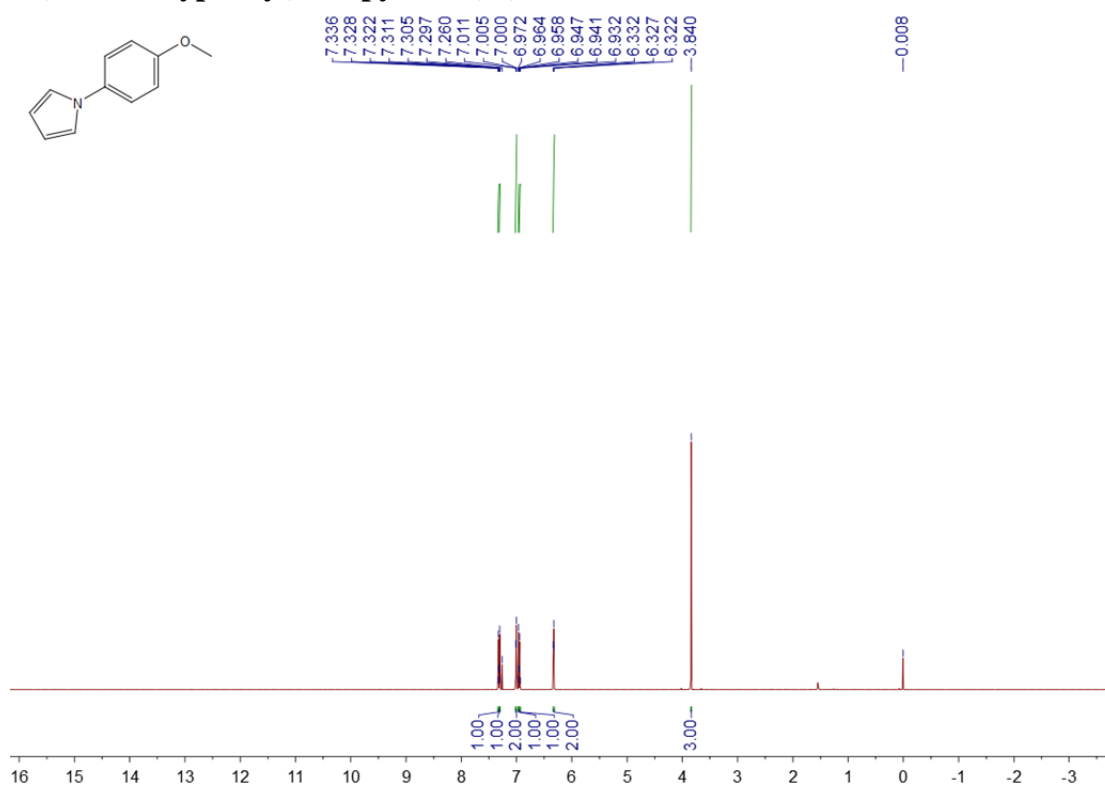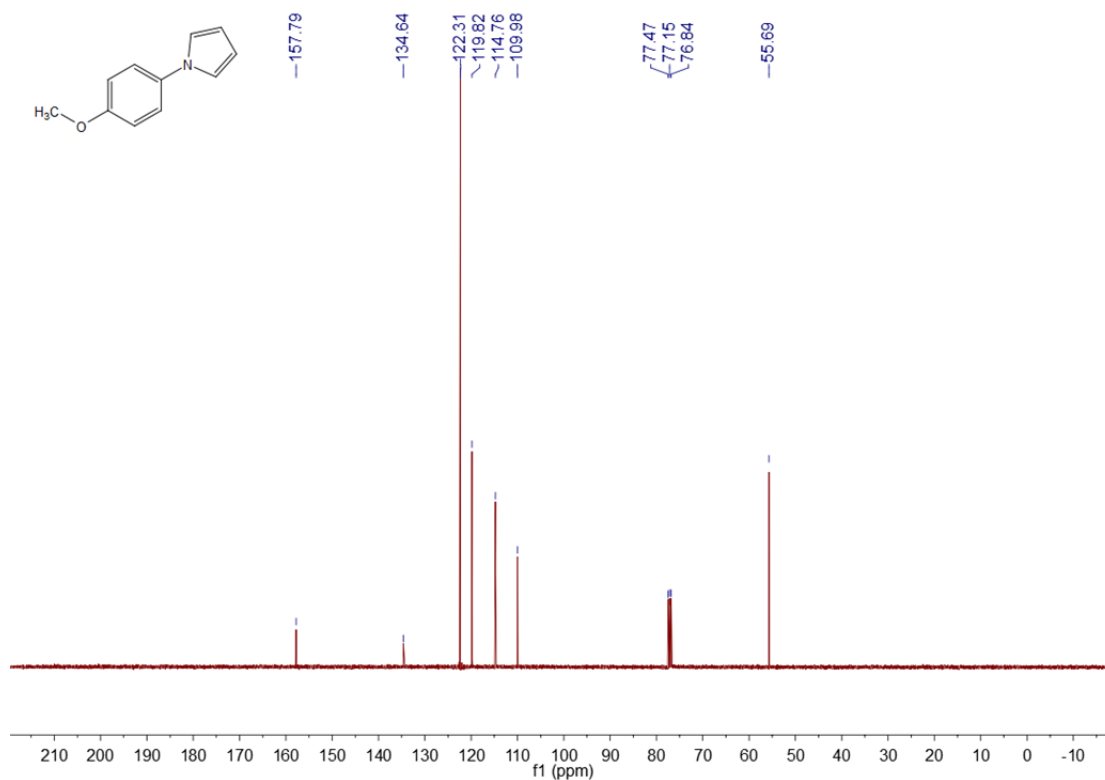

# 1-([1,1'-Biphenyl]-4-yl)-1H-pyrrole (3d)

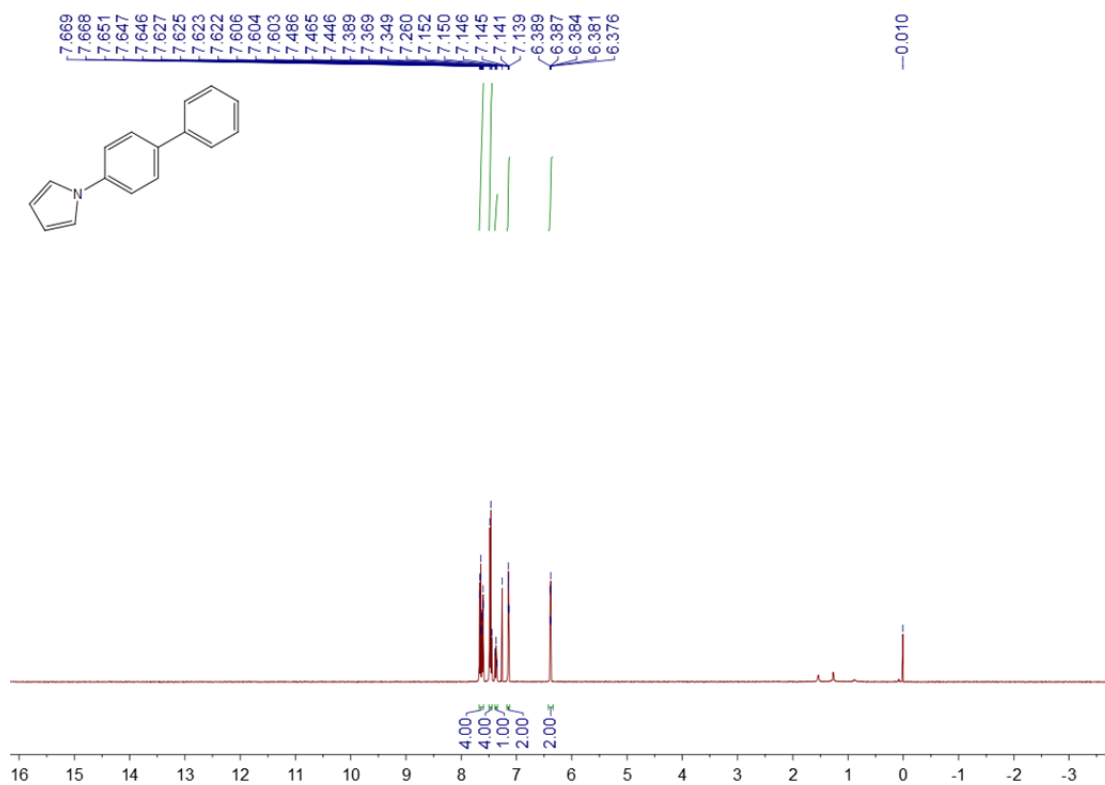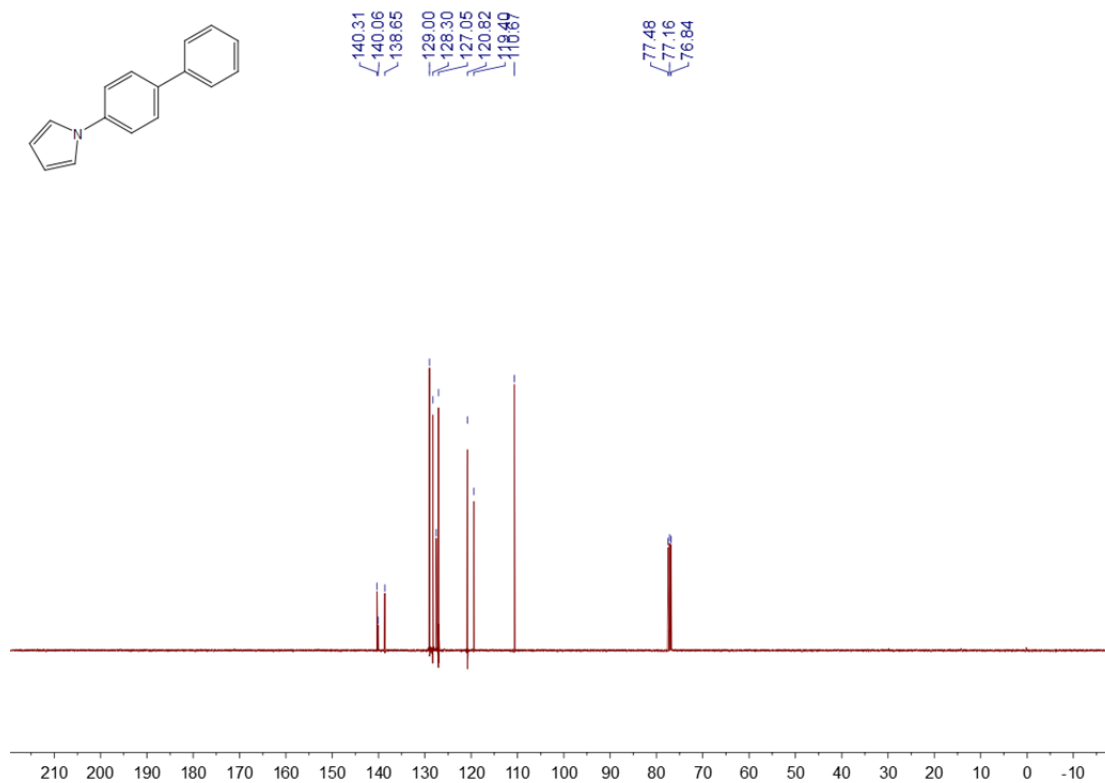

# 1-(3,5-Dimethylphenyl)-1H-pyrrole (3e)

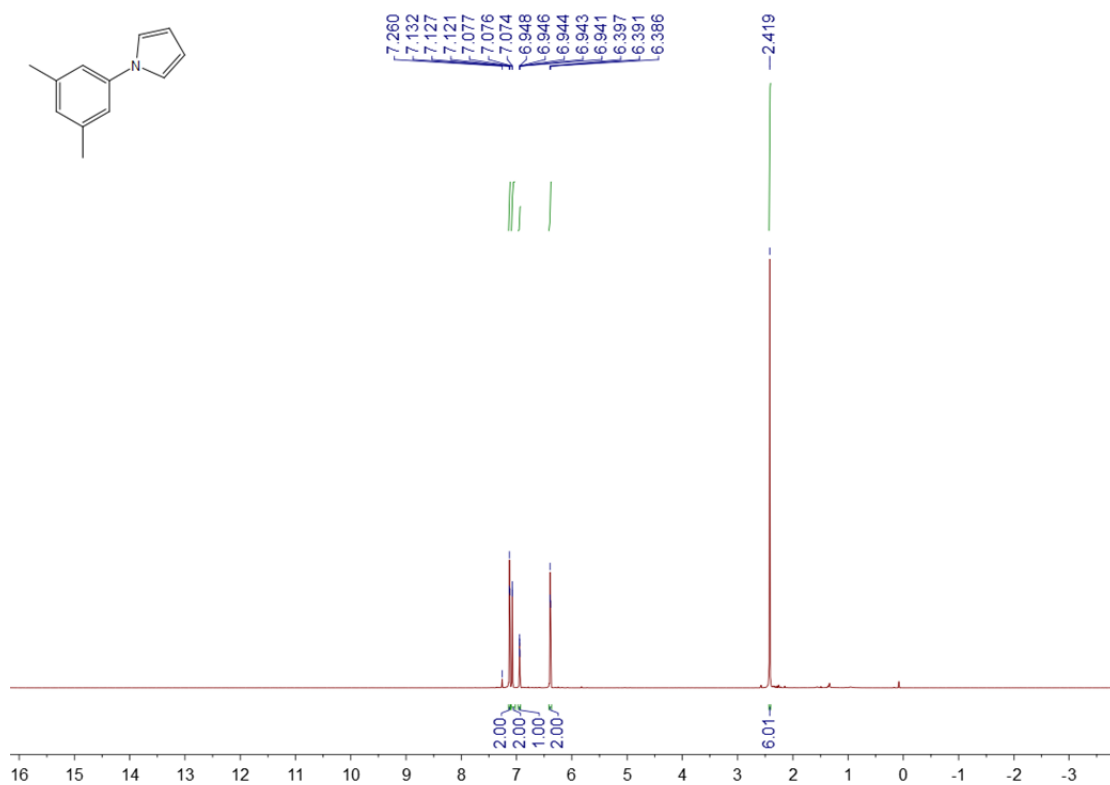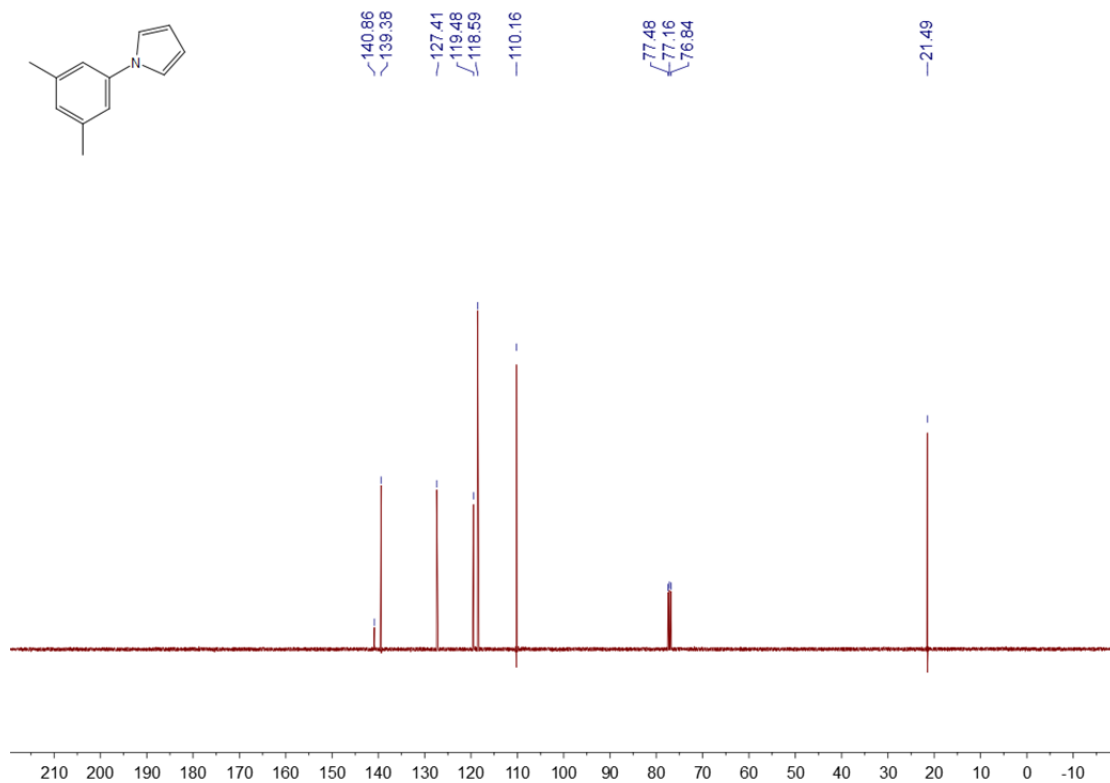

# 1-(4-Chlorophenyl)-1H-pyrrole (3f)

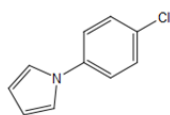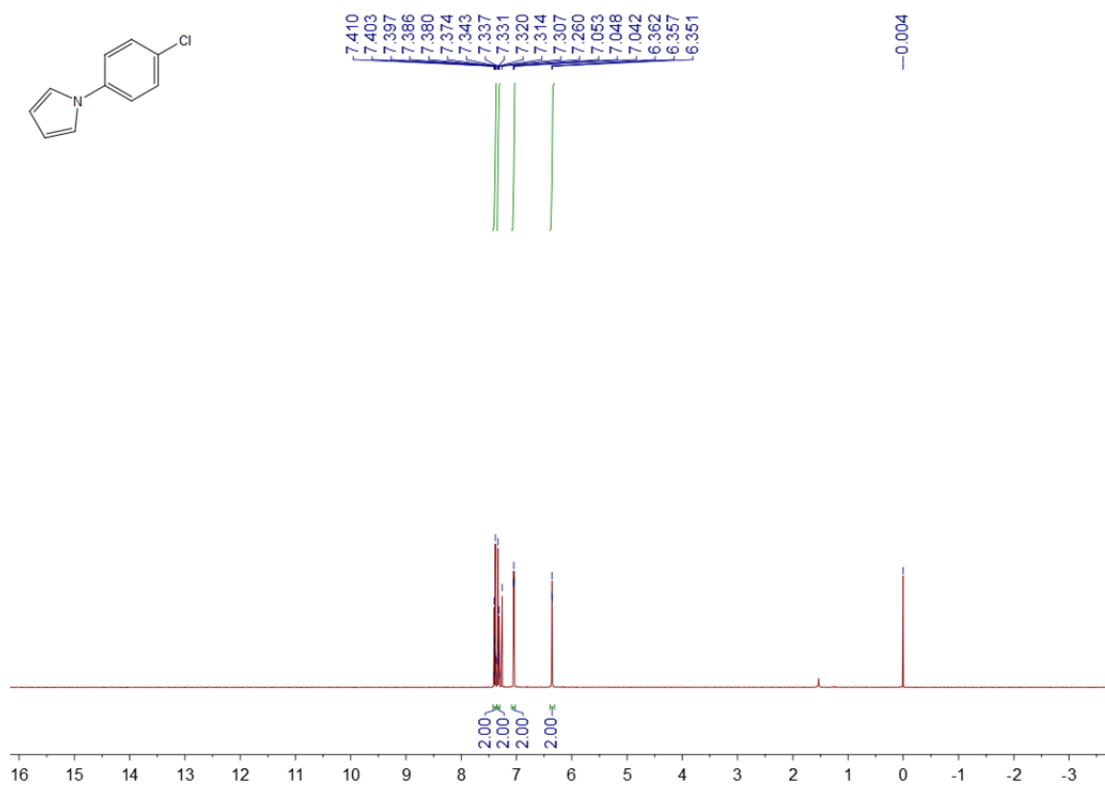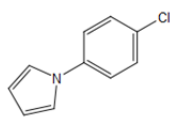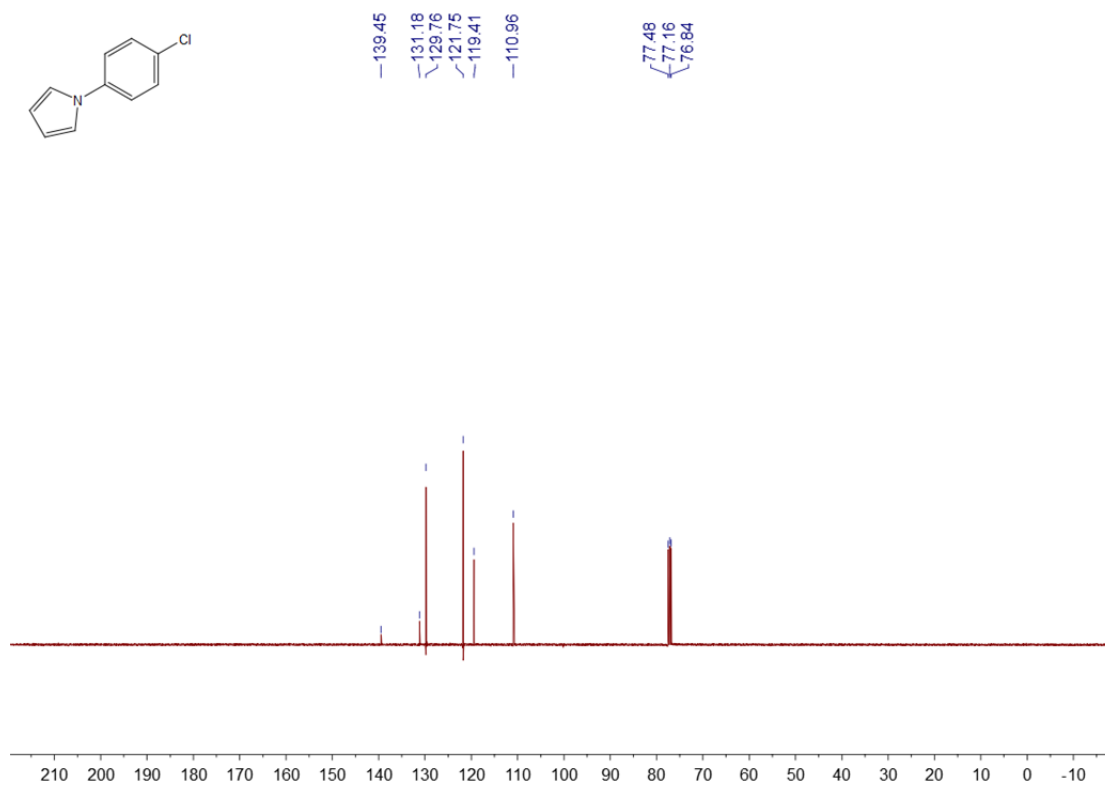

# 1-phenyl-1H-indole (3g)

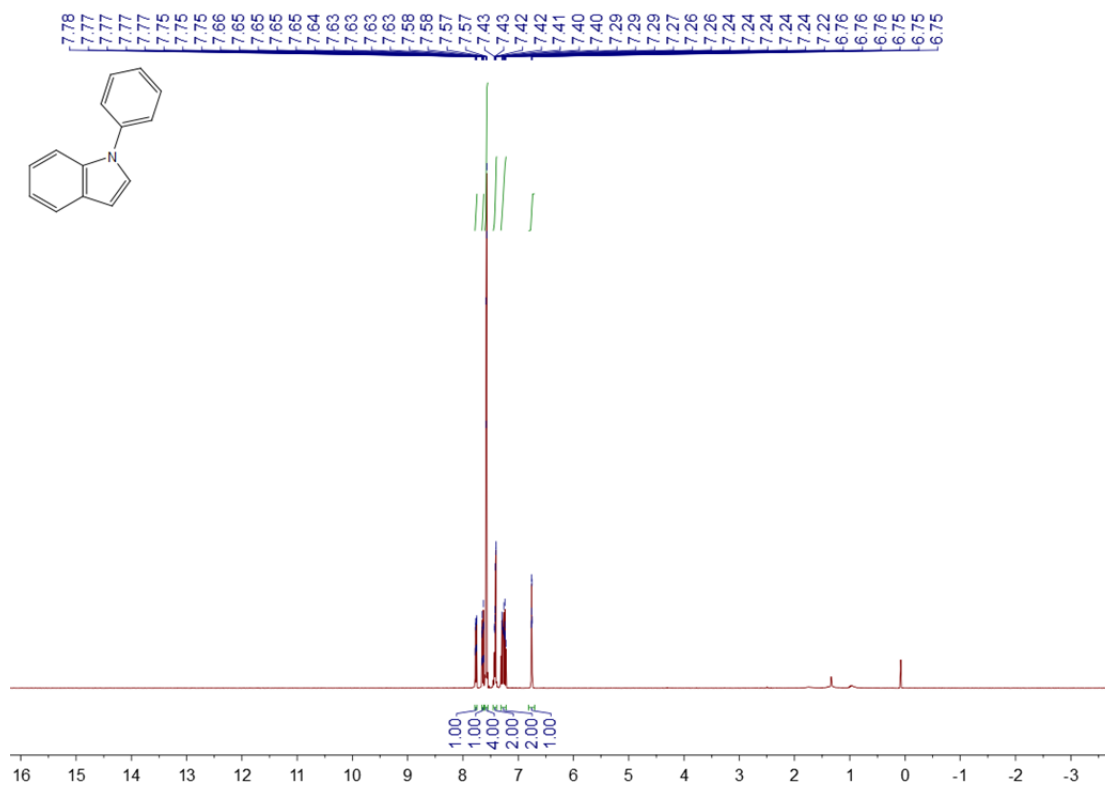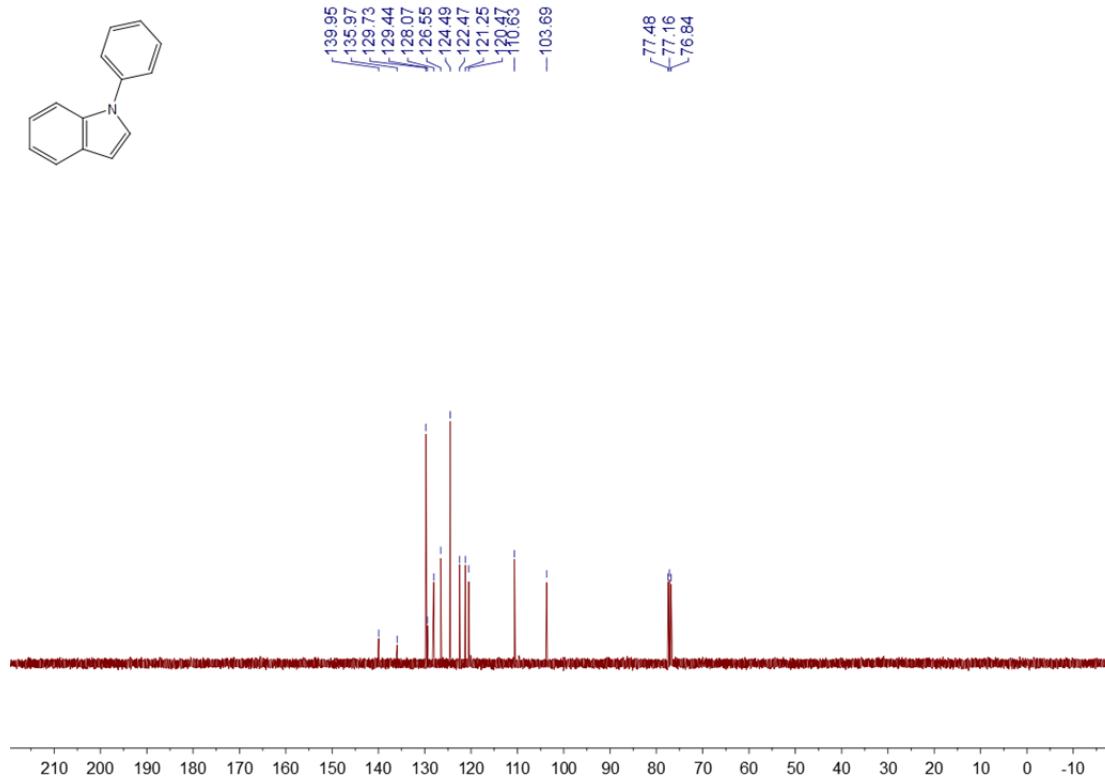

### 1-(*p*-Tolyl)-1*H*-indole (3h)

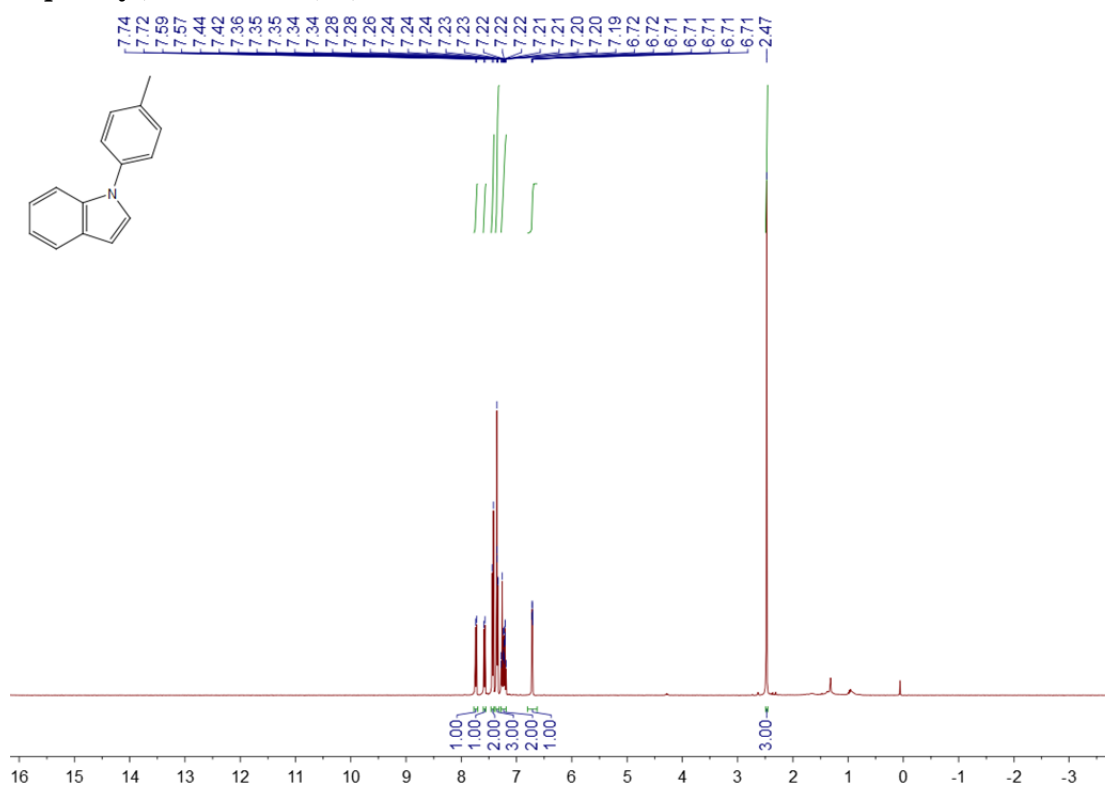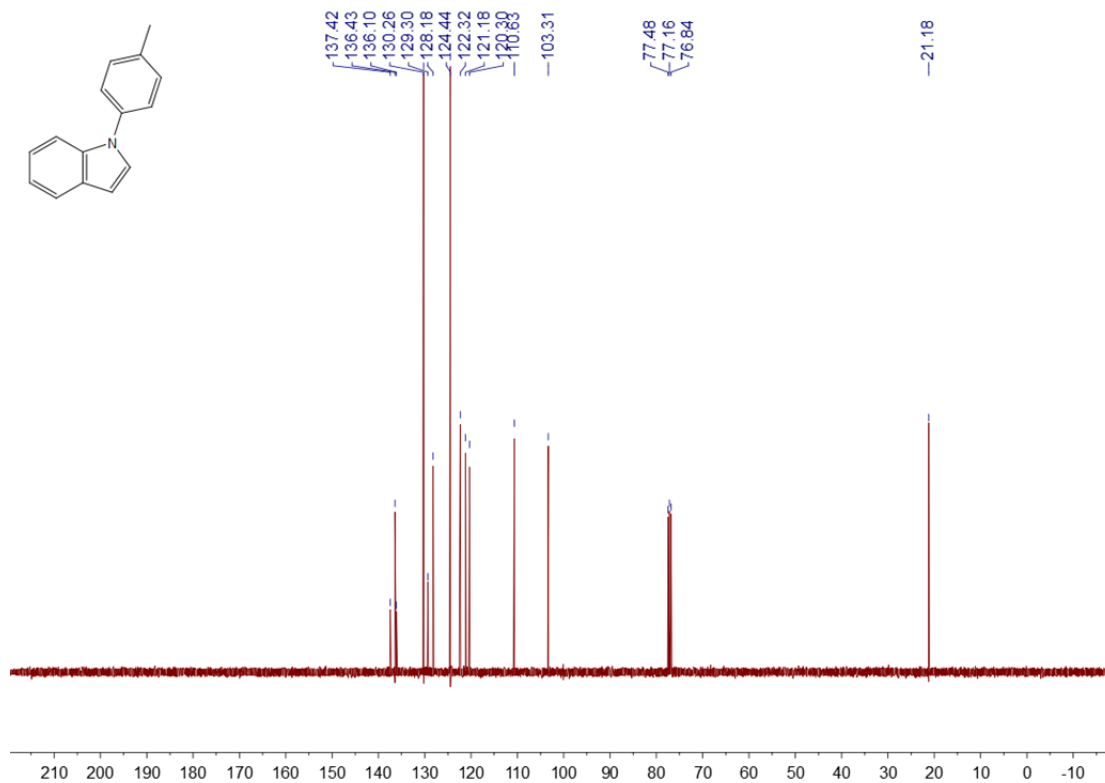

### 1-(4-Methoxyphenyl)-1H-indole (3i)

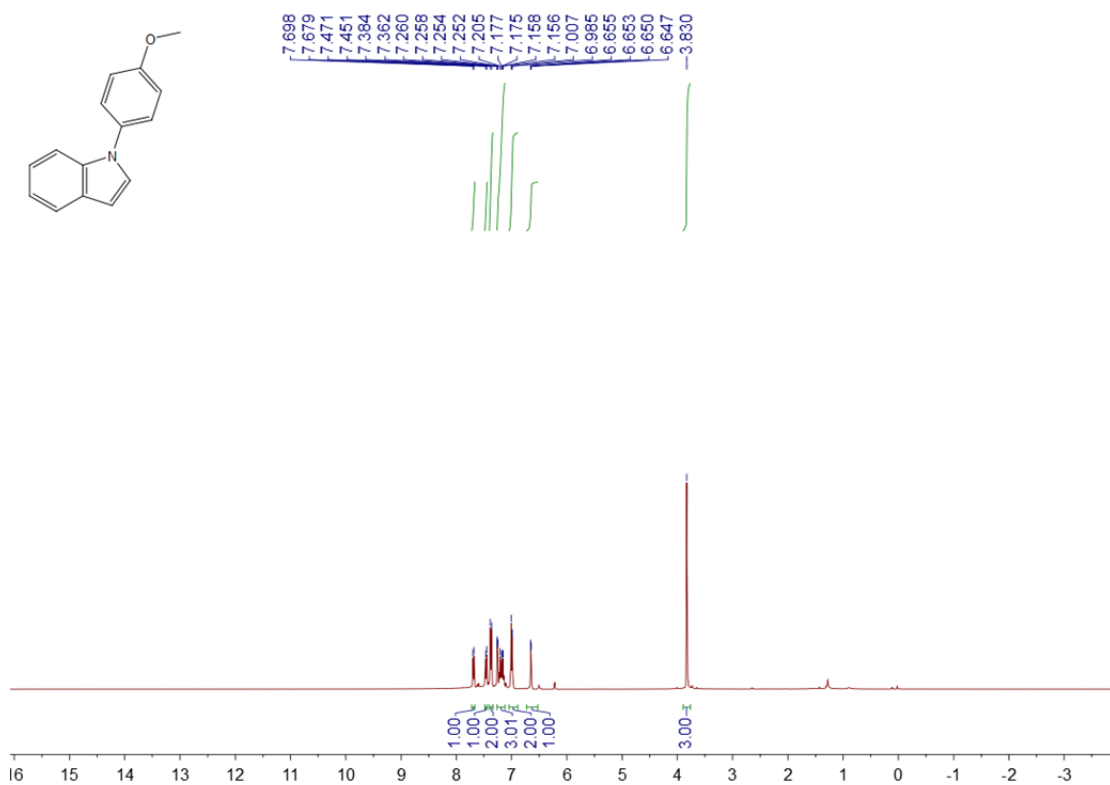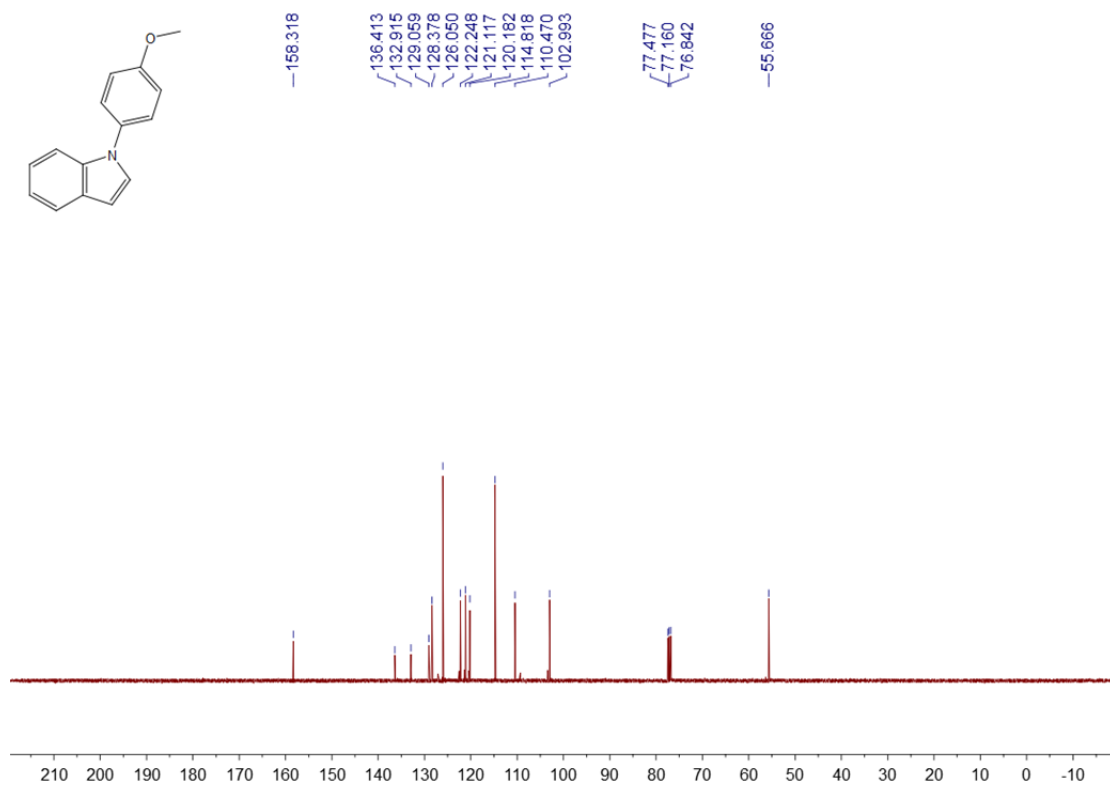

### 1-(4-Chlorophenyl)-1H-indole (3j)

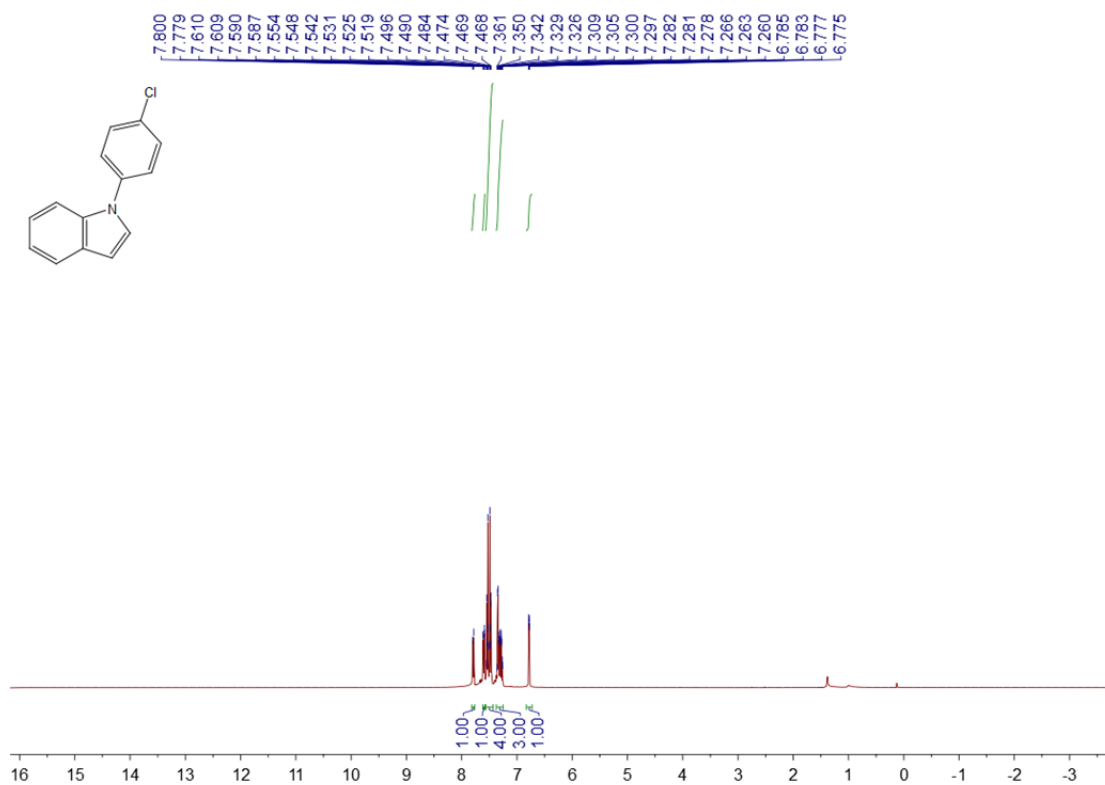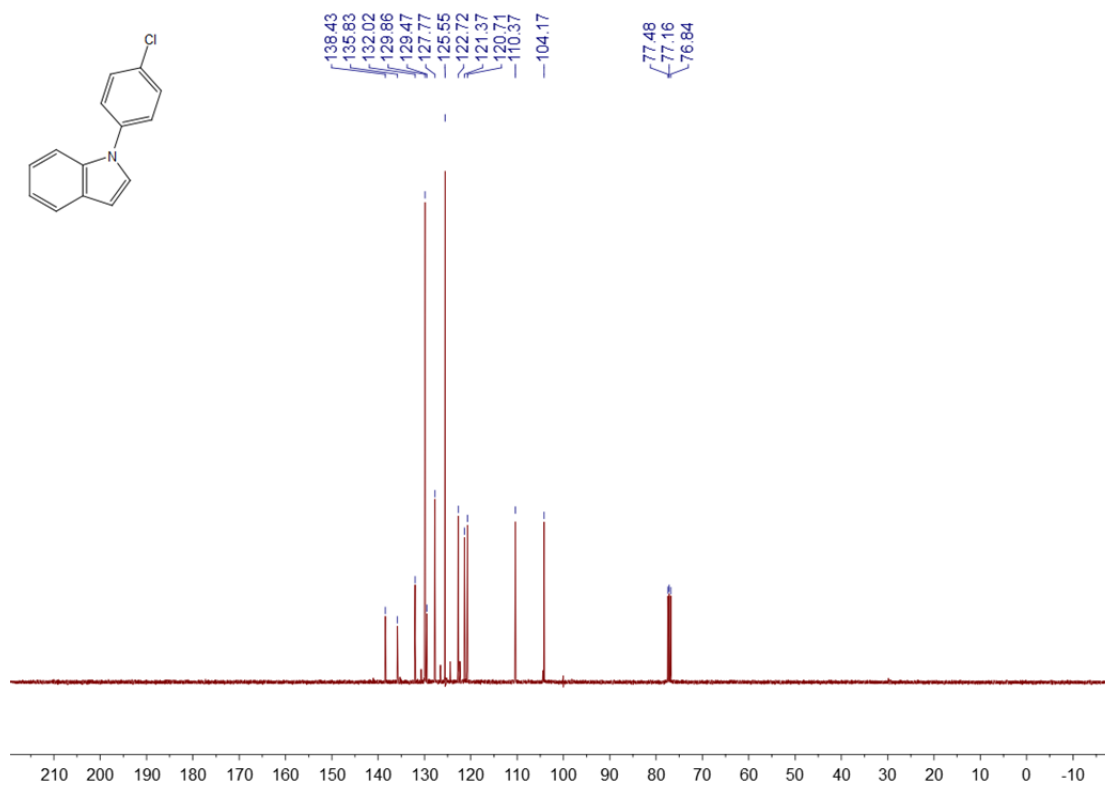



### 1-(4-Nitrophenyl)-1H-indole (3k)

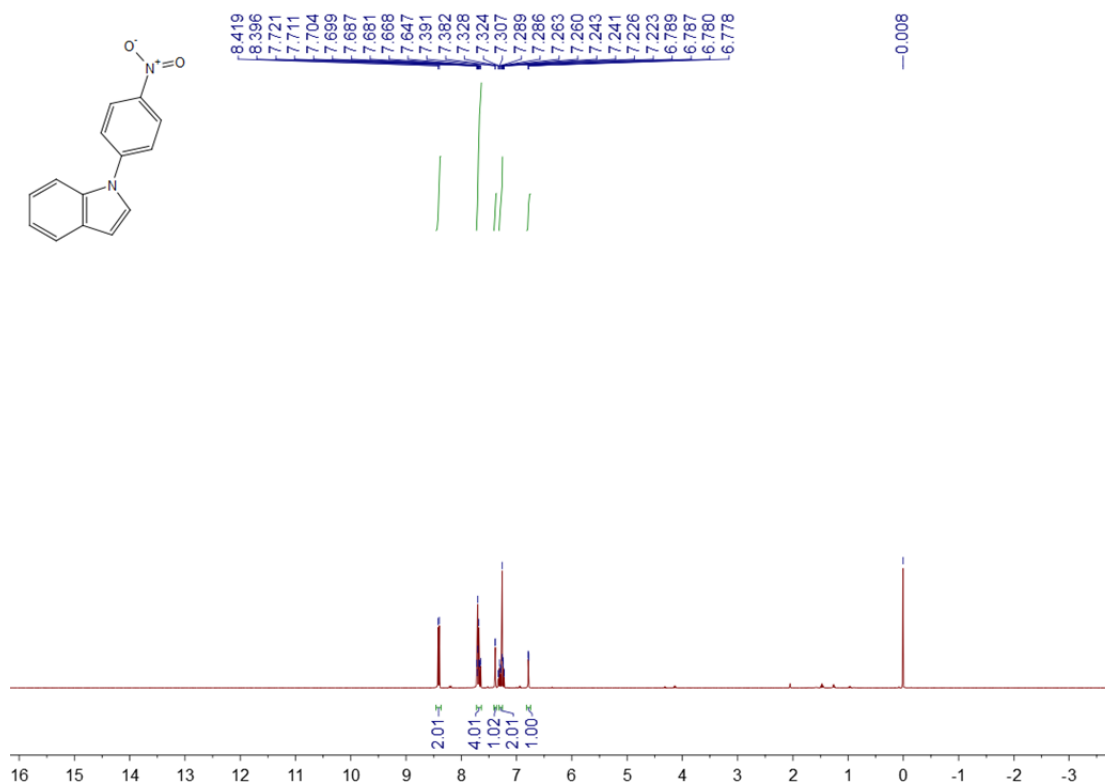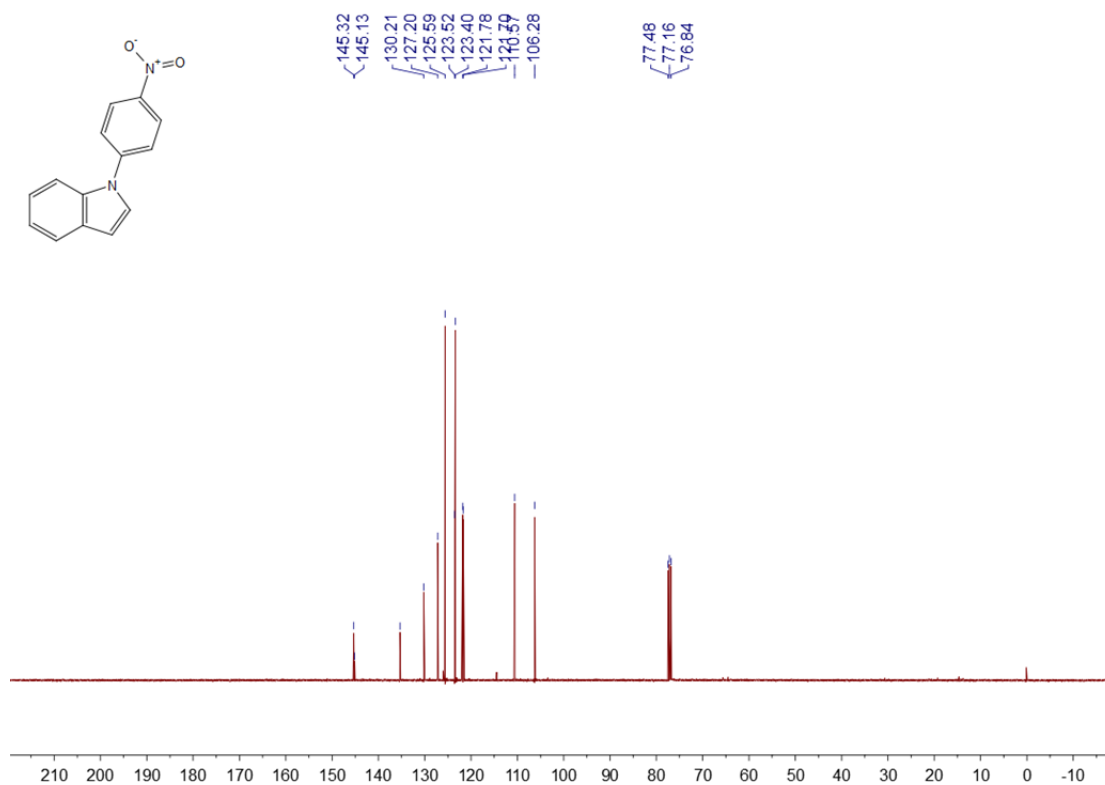

# 1-([1,1'-Biphenyl]-4-yl)-1H-indole (3l)

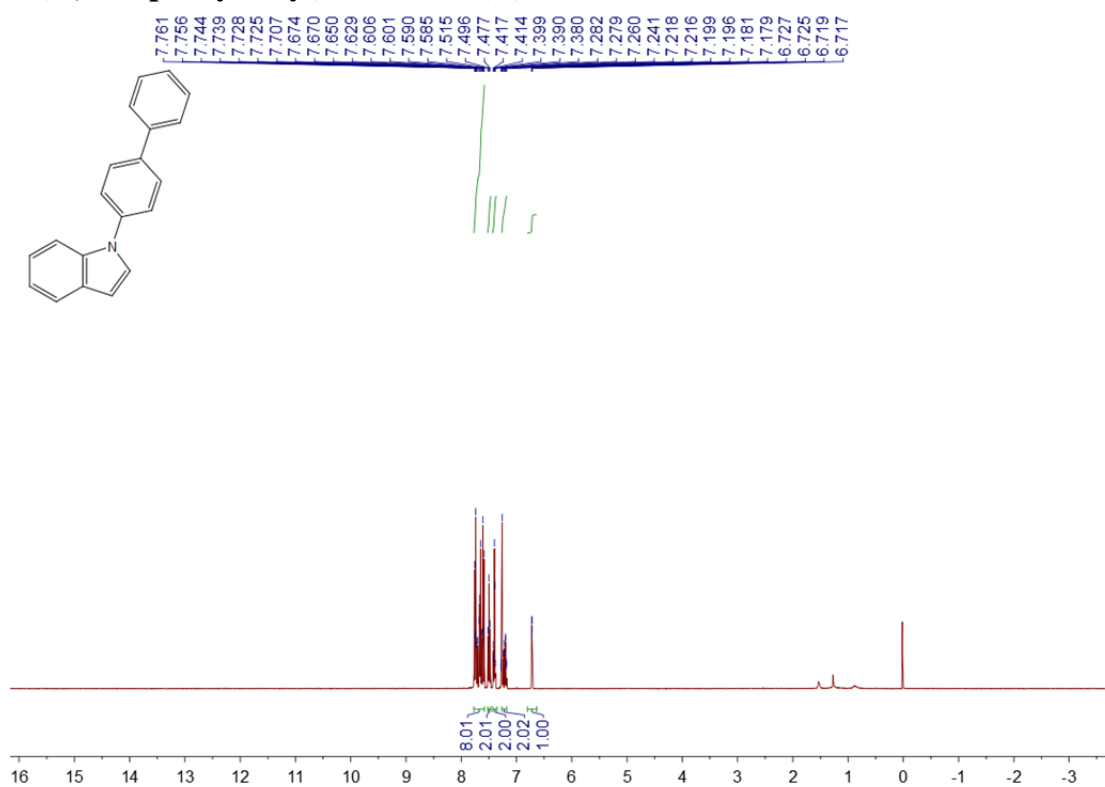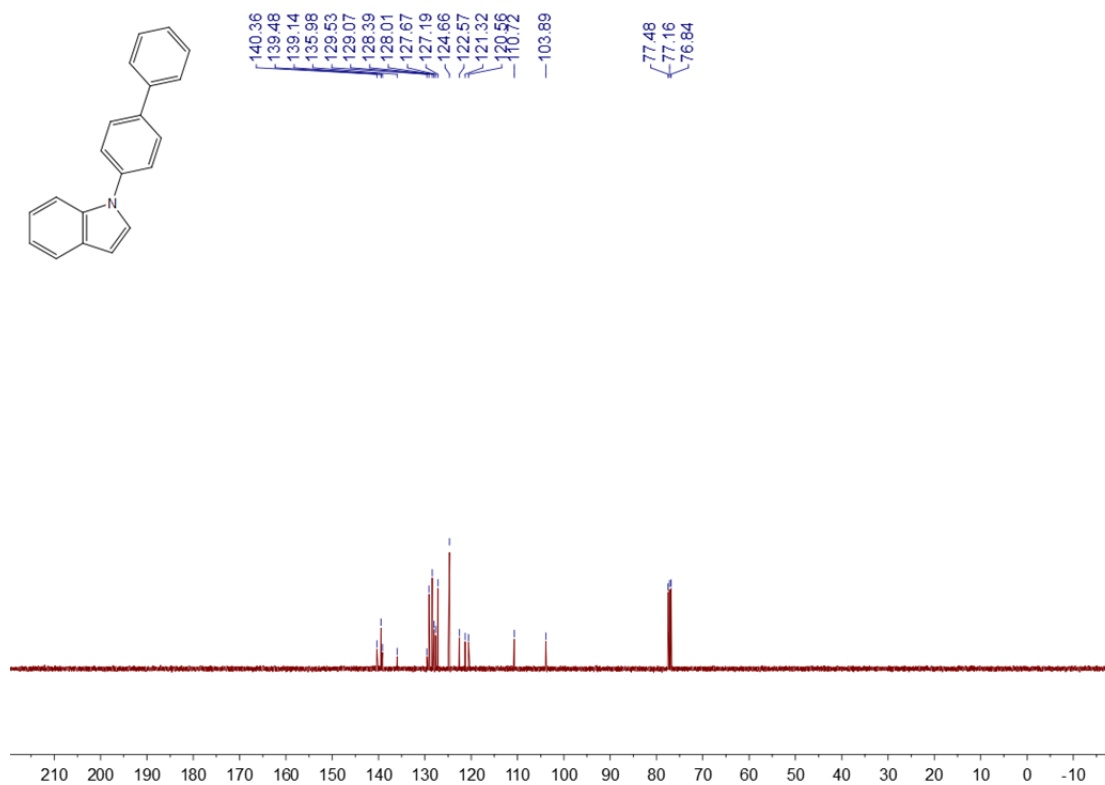

### 5-methoxy-1-(*p*-Tolyl)-1*H*-indole (3m)

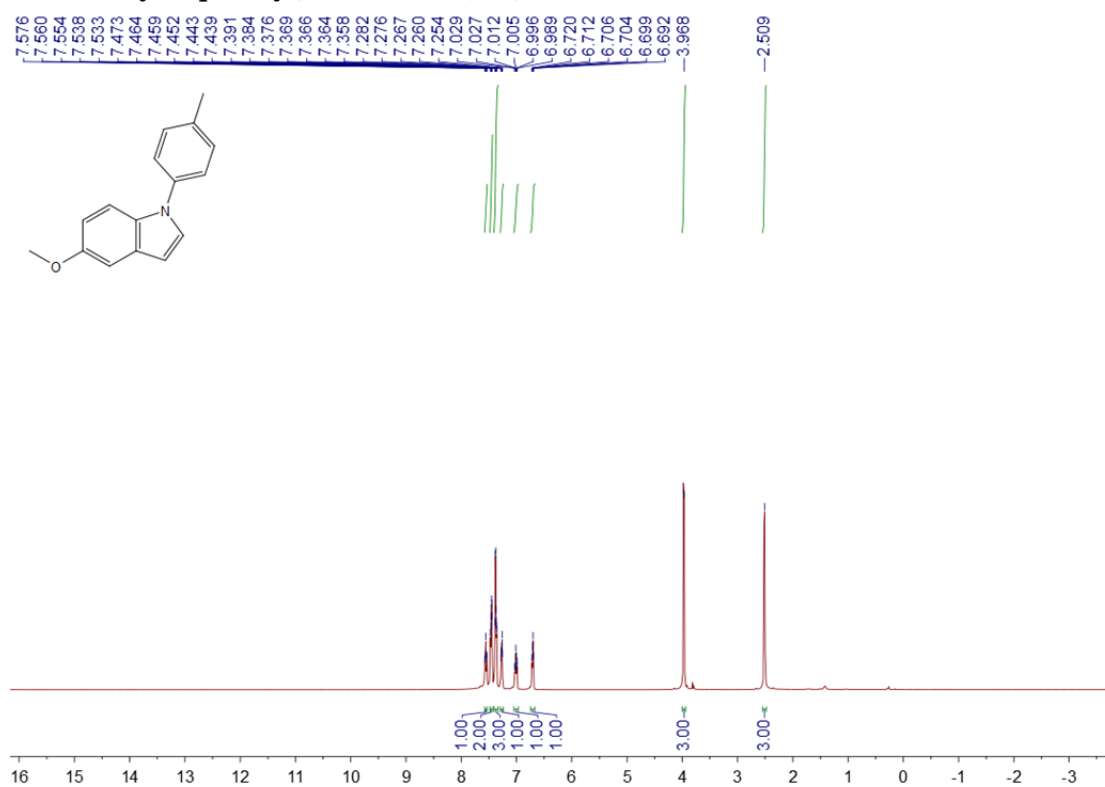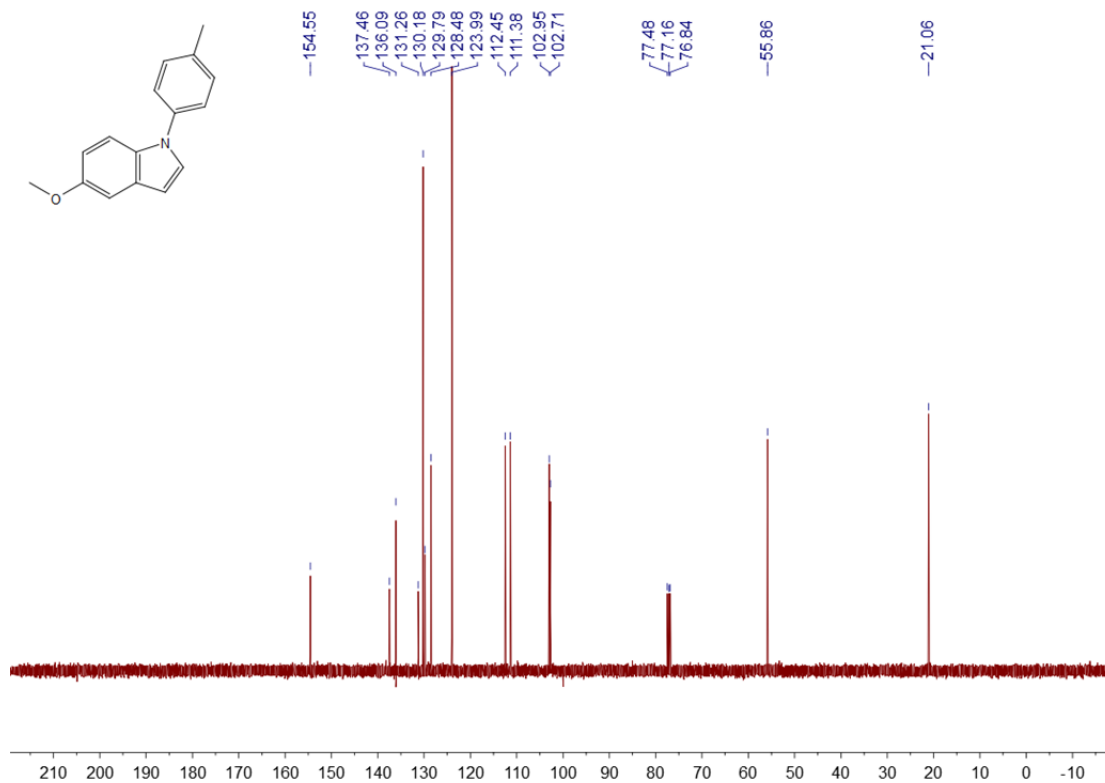

### 5-bromo-1-(*p*-Tolyl)-1*H*-indole (3n)

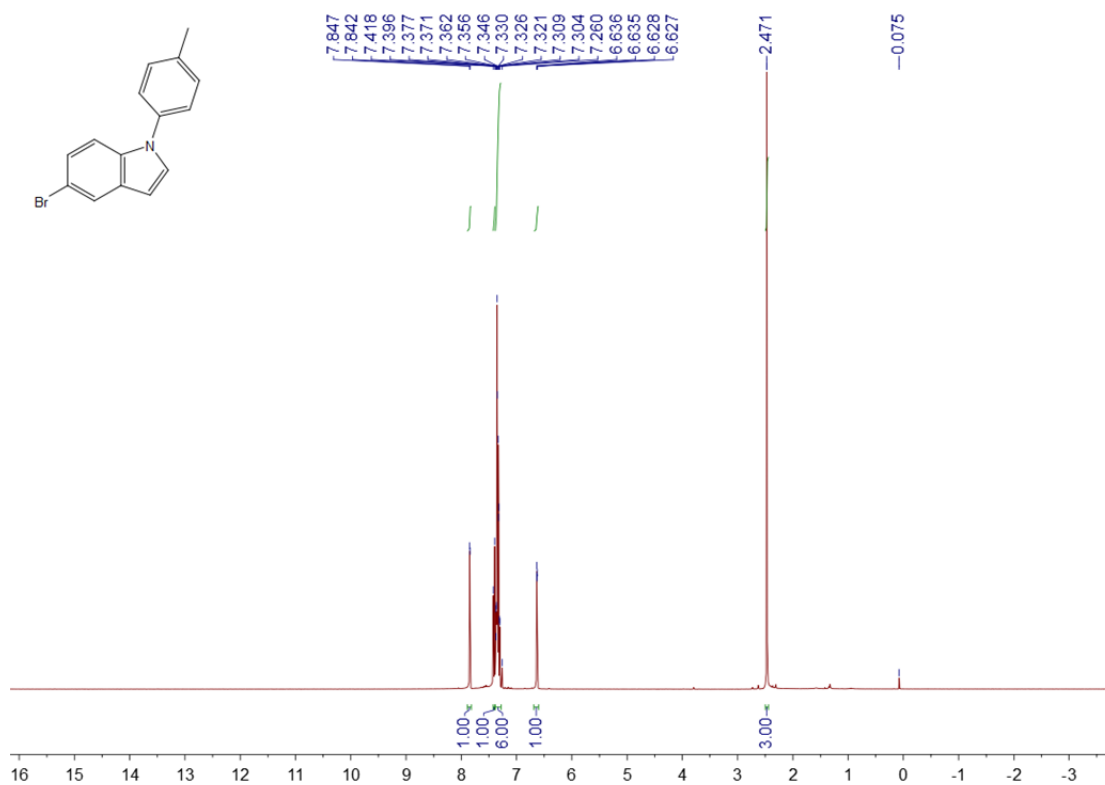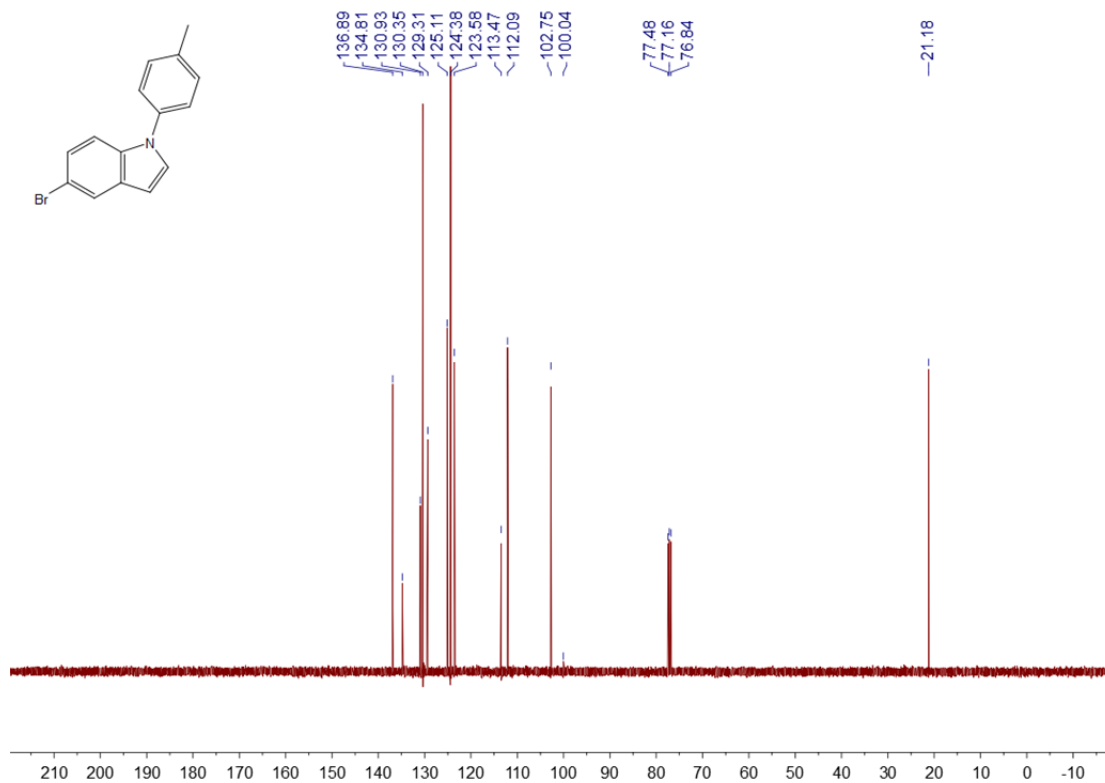

# 1-phenyl-1H-1,2,4-triazole (3o)

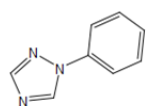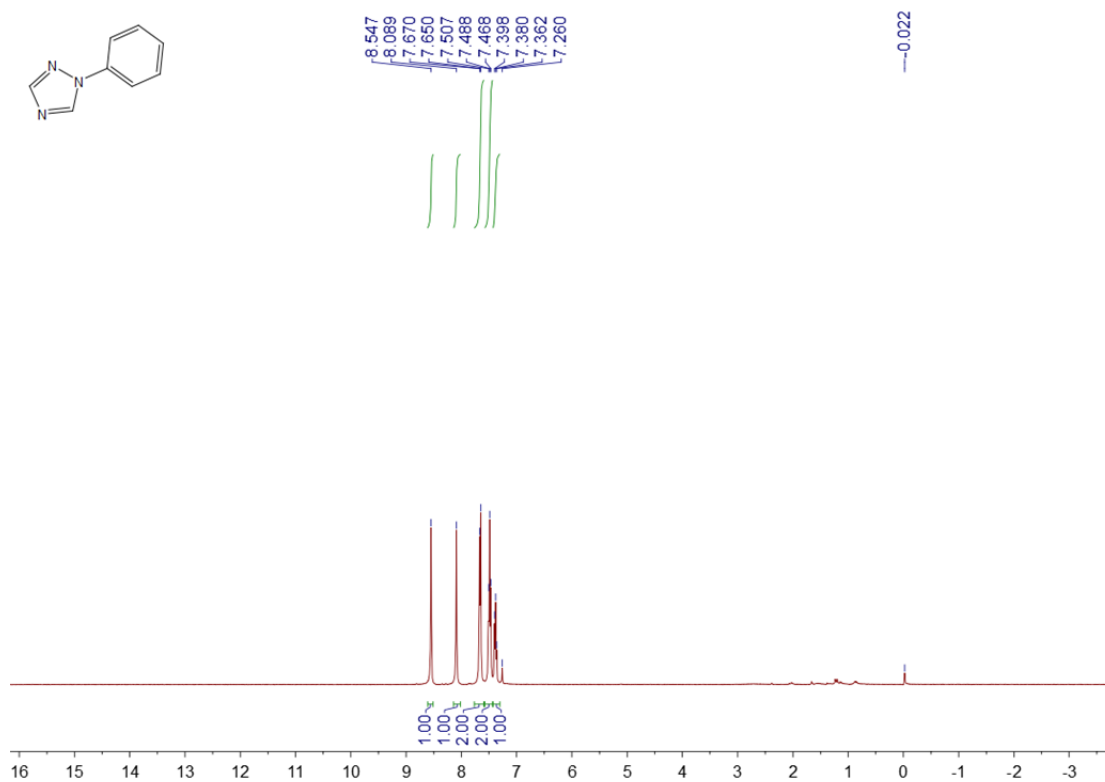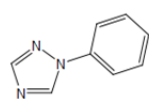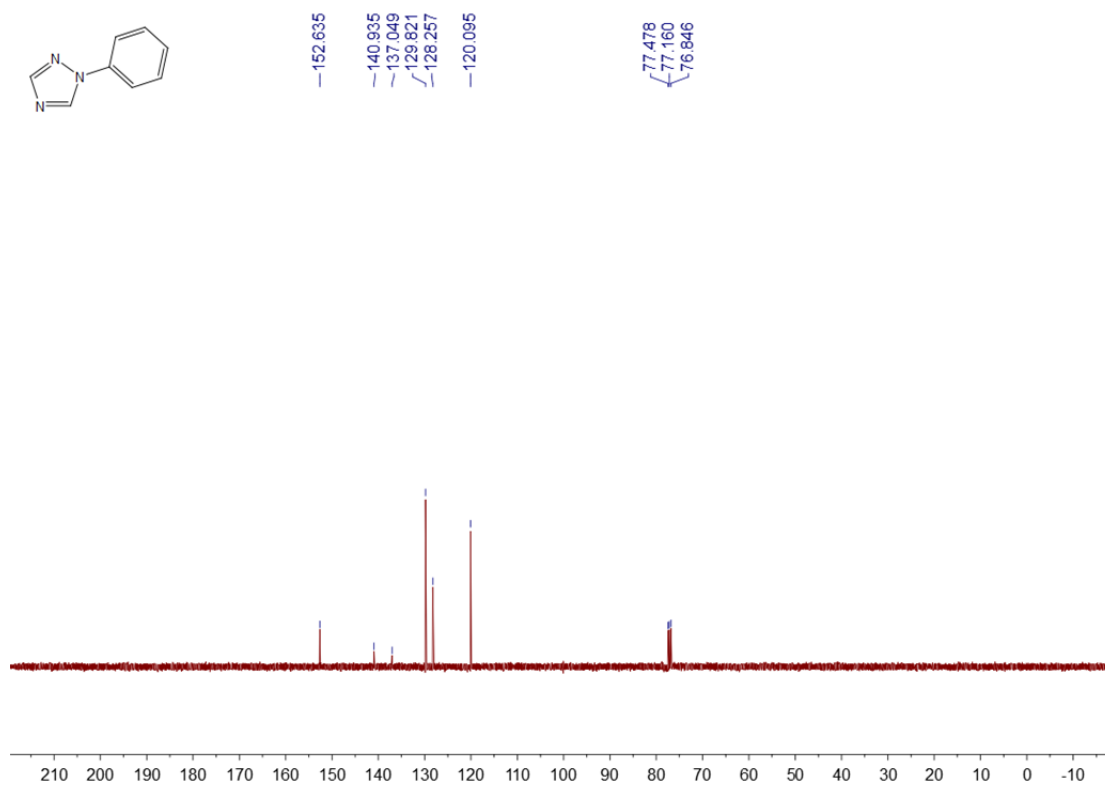

# 1-(*p*-Tolyl)-1*H*-1,2,4-triazole (3p)

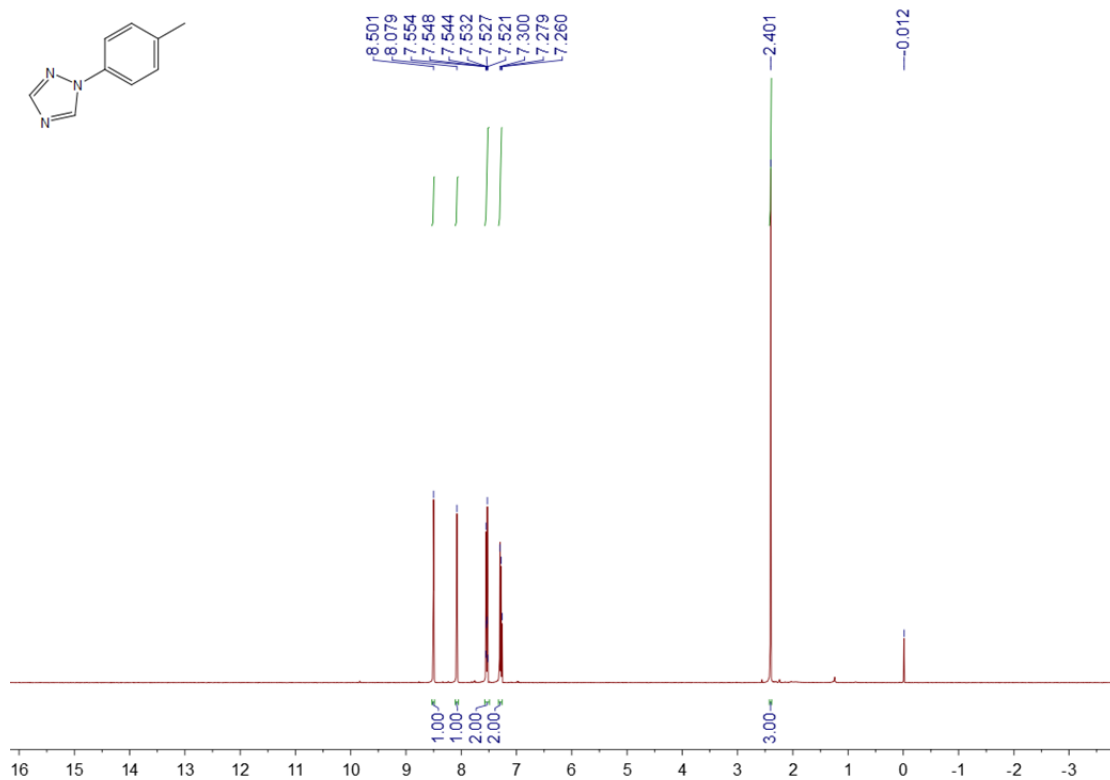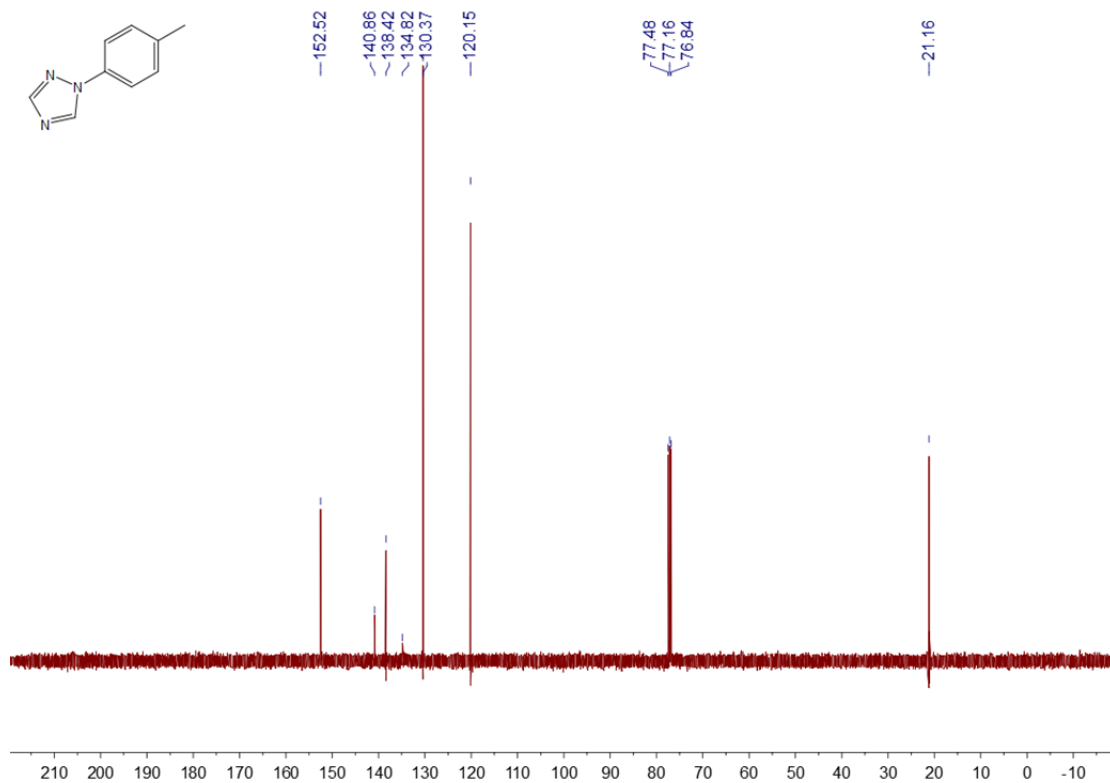

# 1-(4-Methoxyphenyl)-1H-1,2,4-triazole (3q)

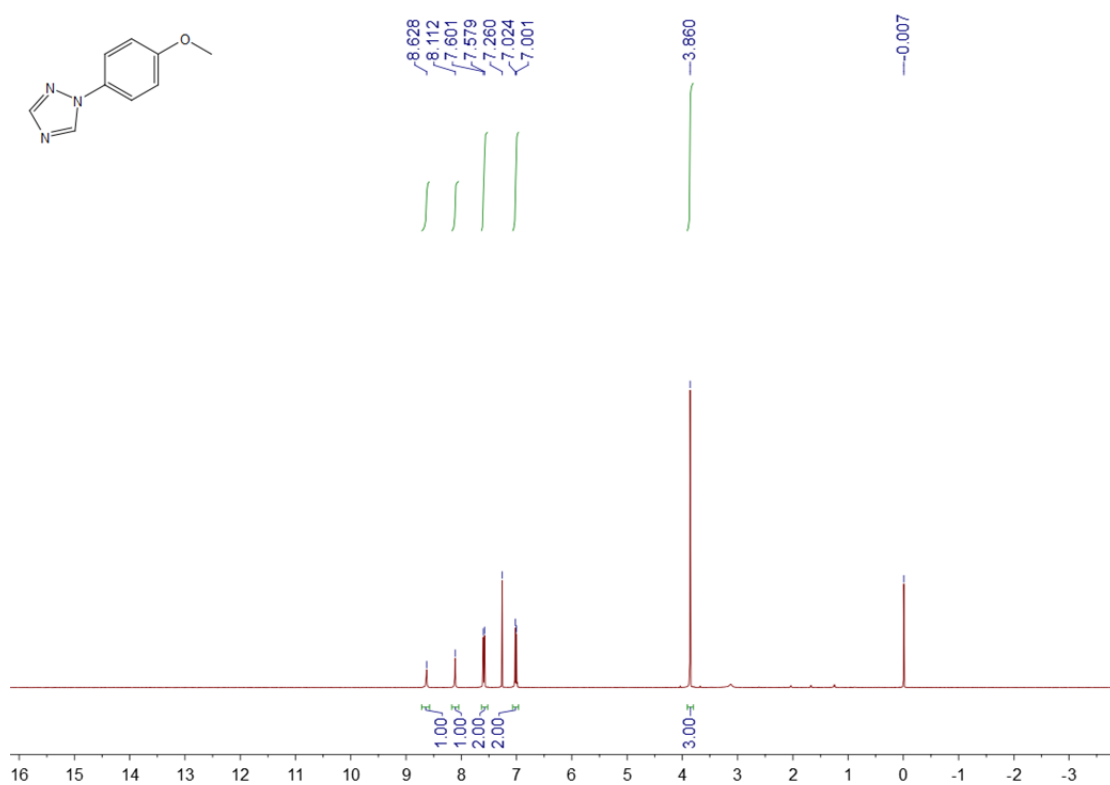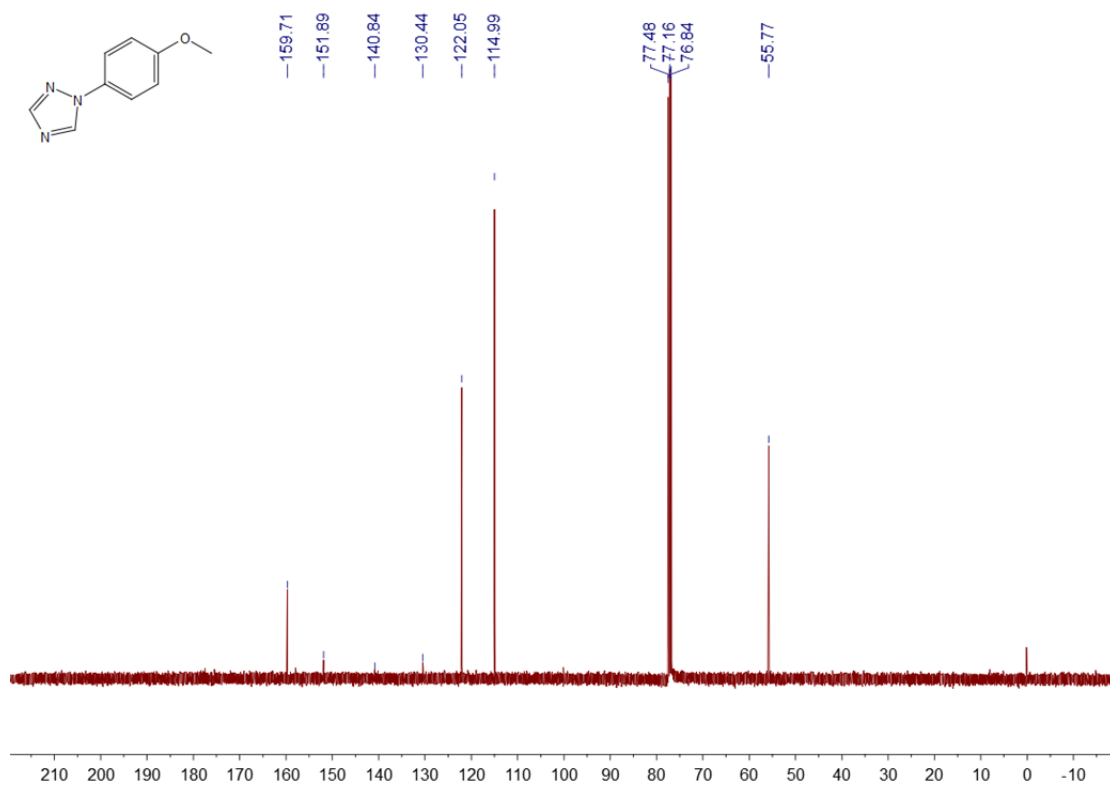

### 1-(3,5-Dimethylphenyl)-1H-1,2,4-triazole (3r)

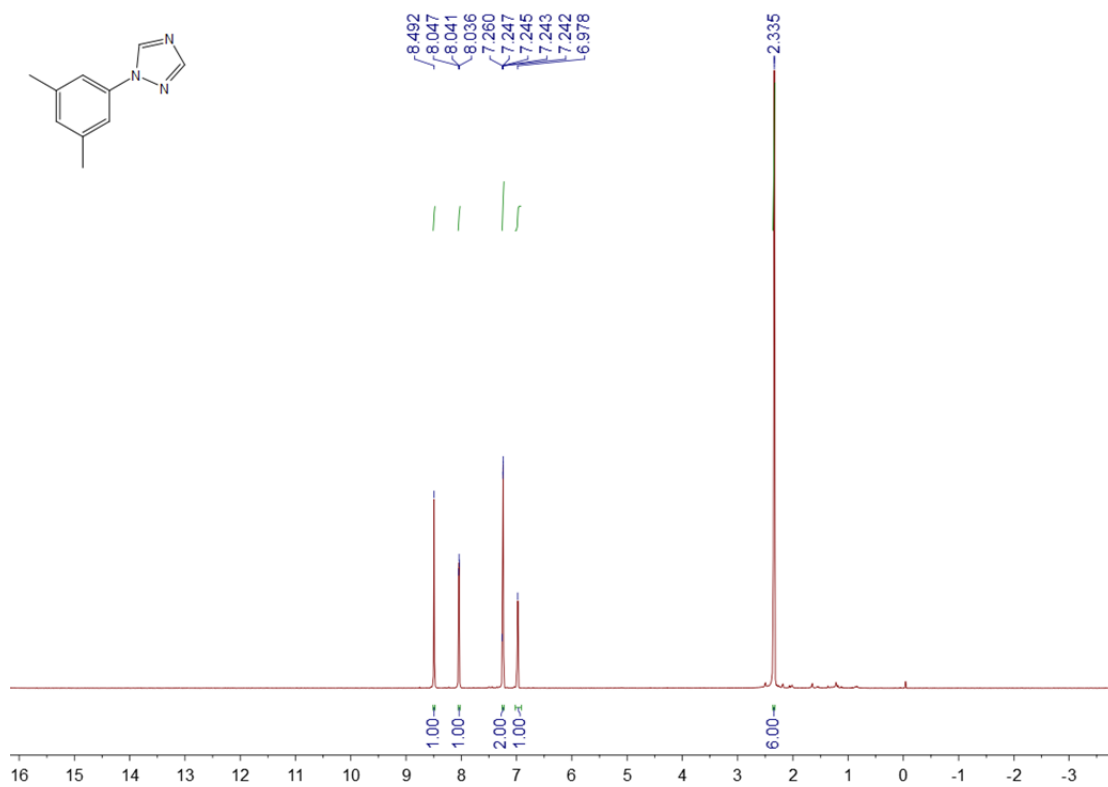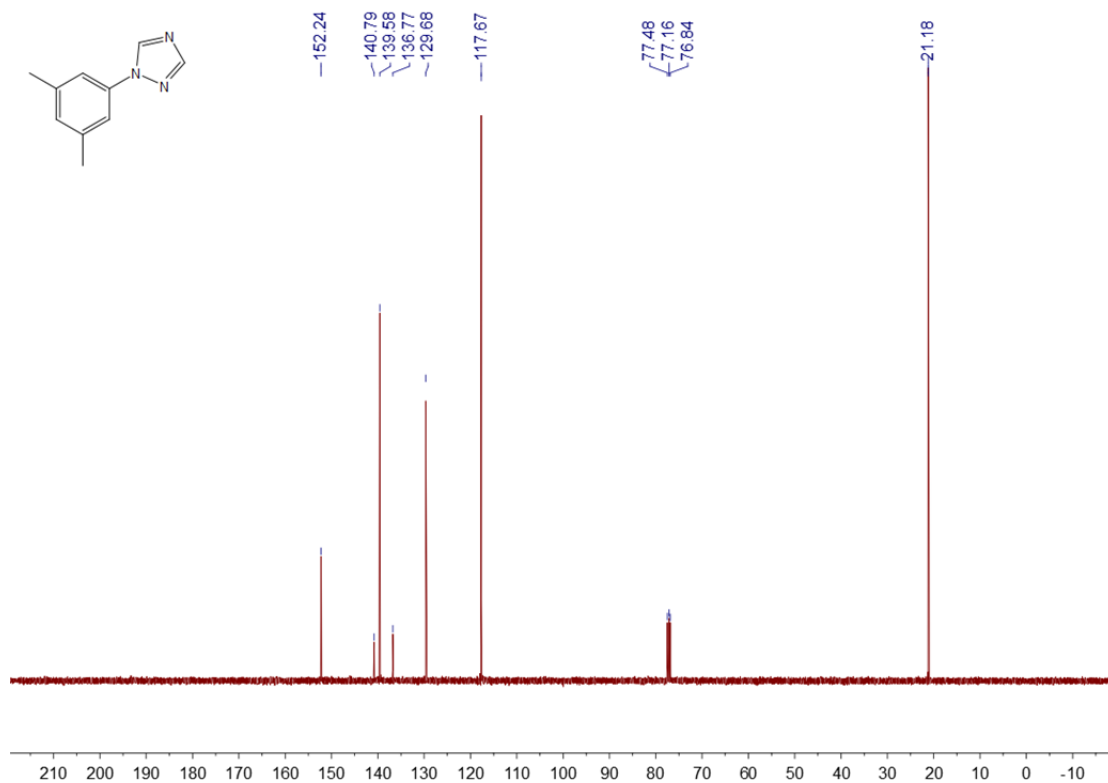



### 1-(4-Chlorophenyl)-1H-1,2,4-triazole (3s)

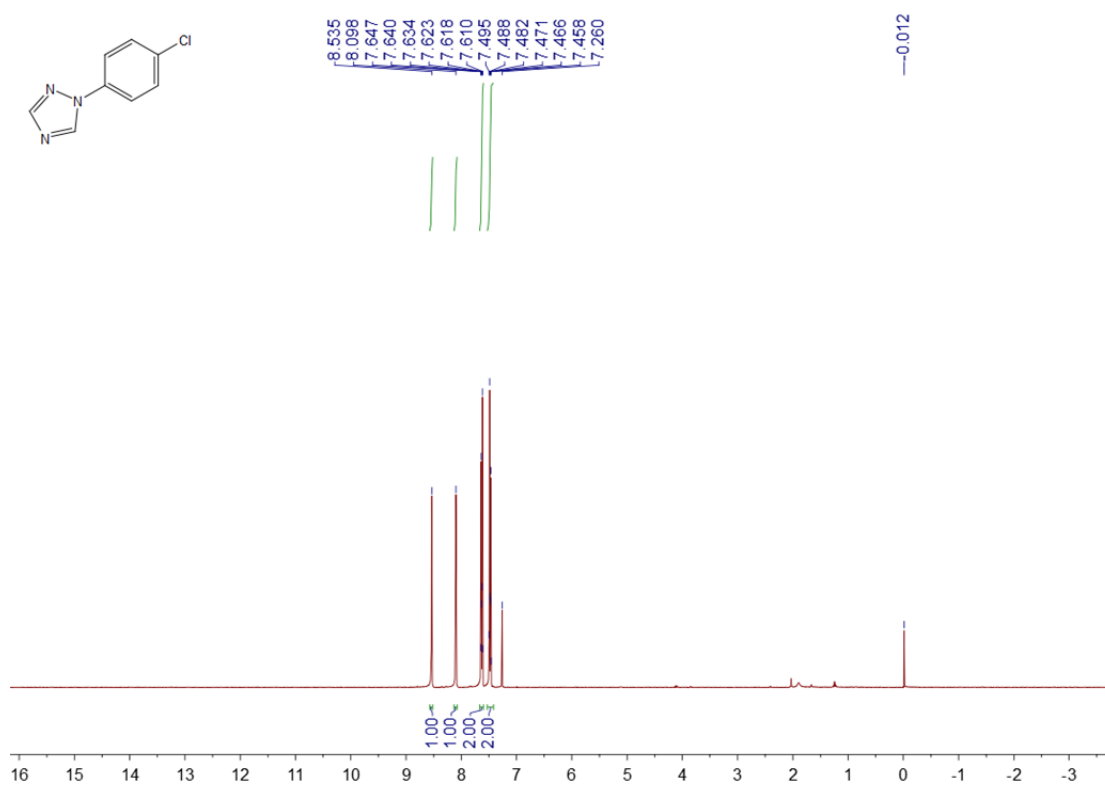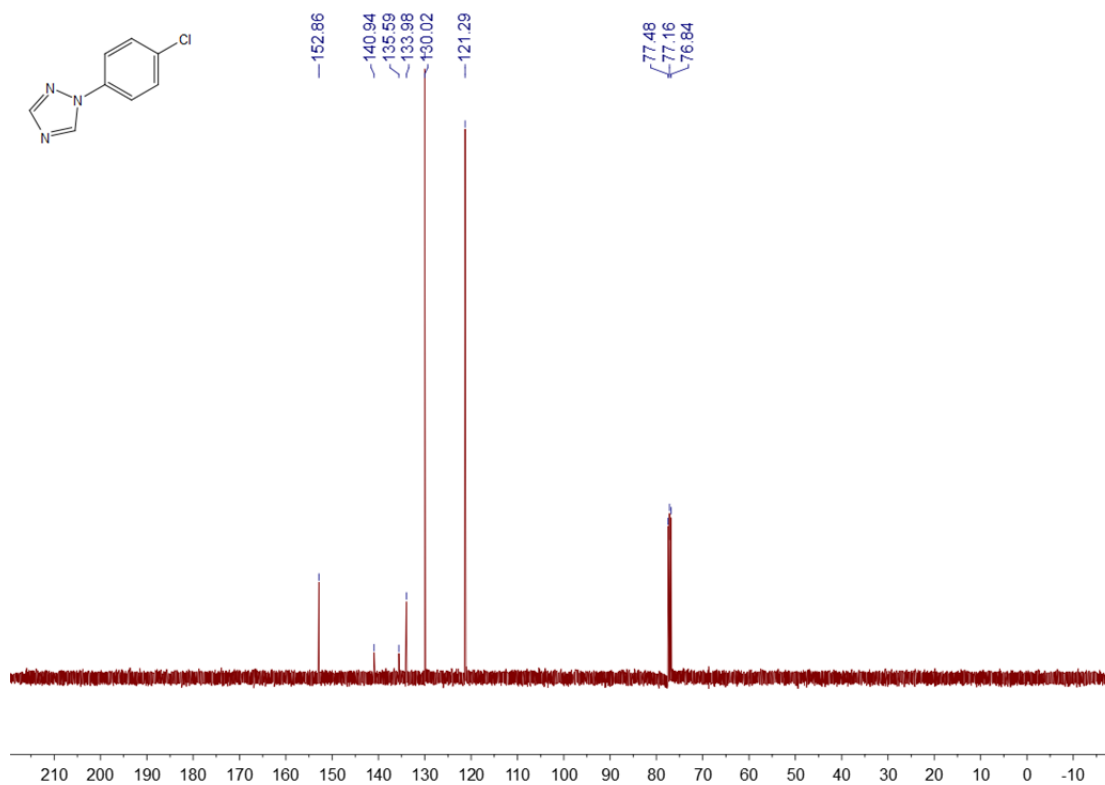

# 1-(4-Nitrophenyl)-1H-1,2,4-triazole (3t)

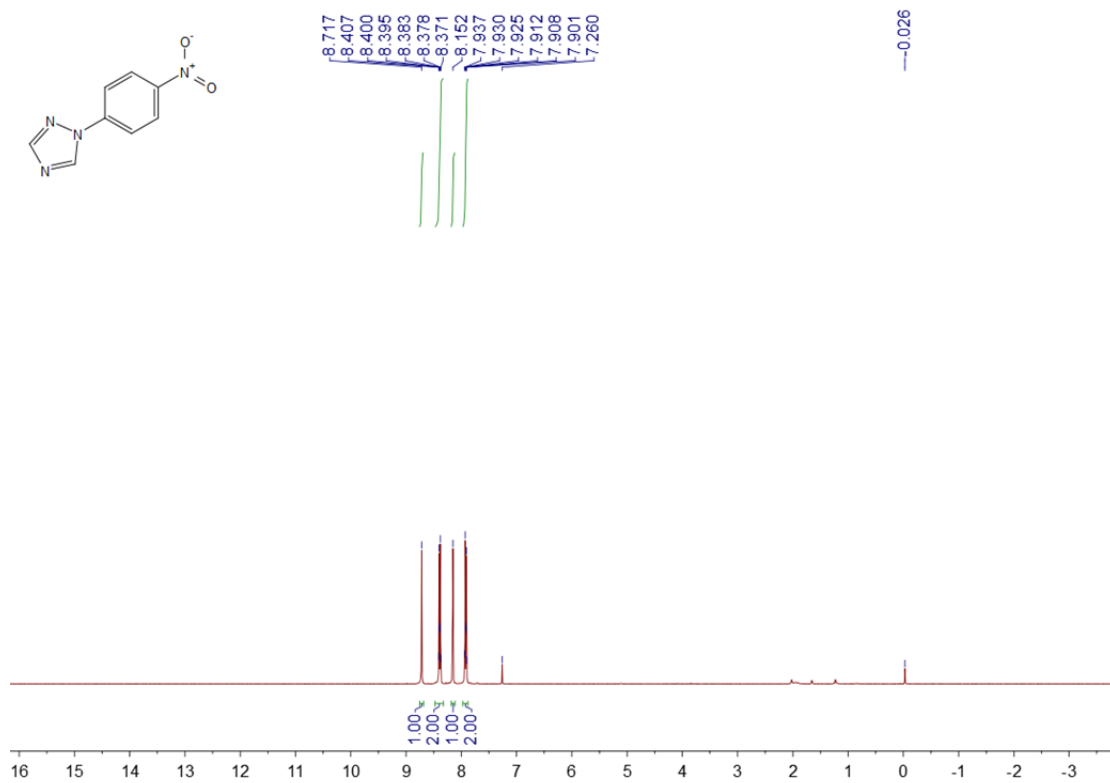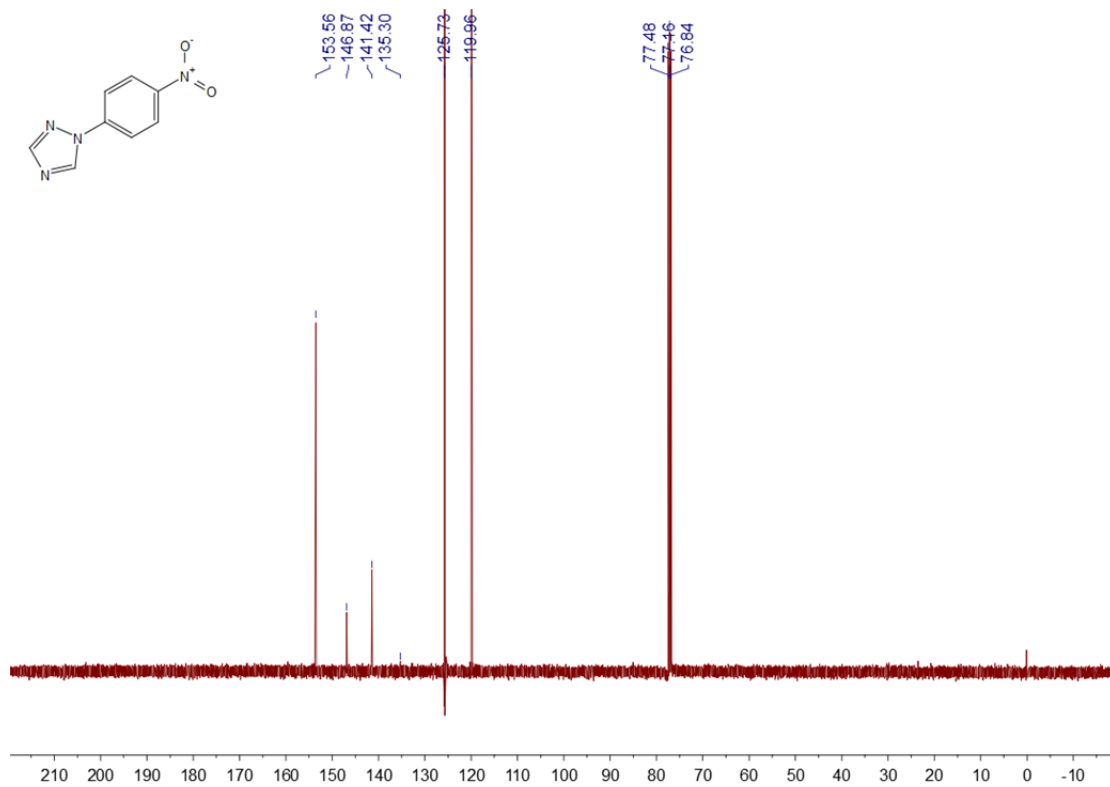

# 1-([1,1'-Biphenyl]-4-yl)-1H-1,2,4-triazole (3u)

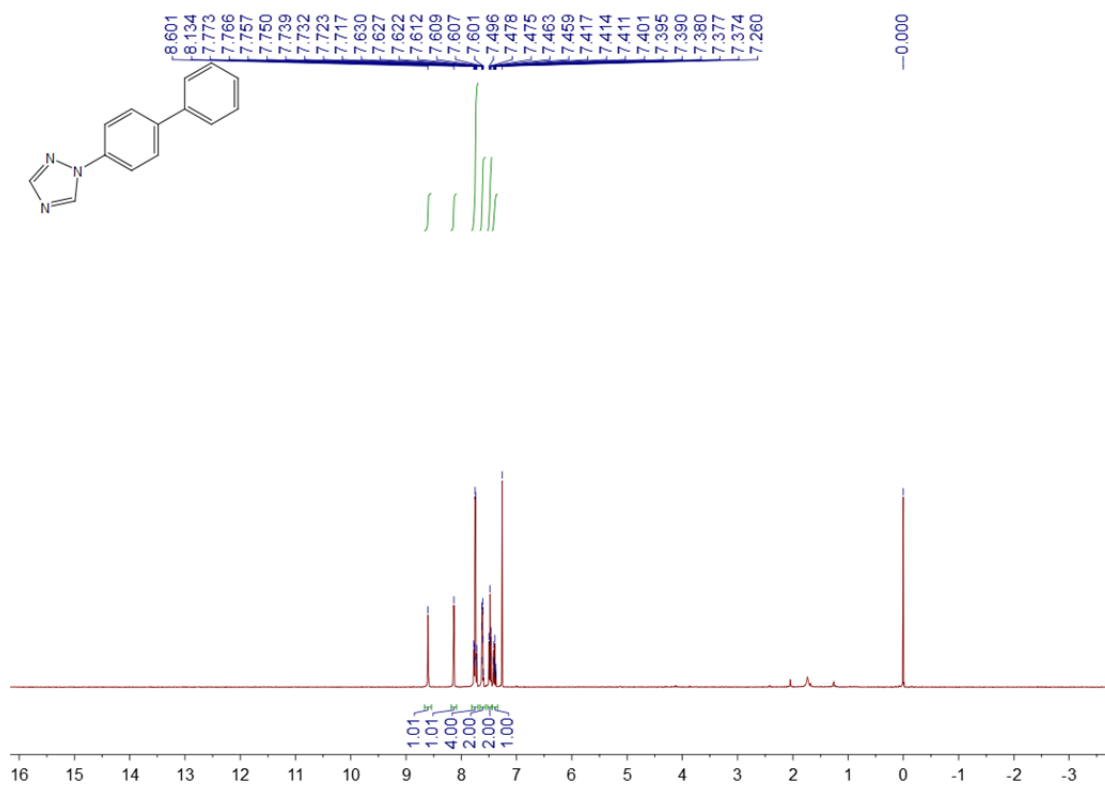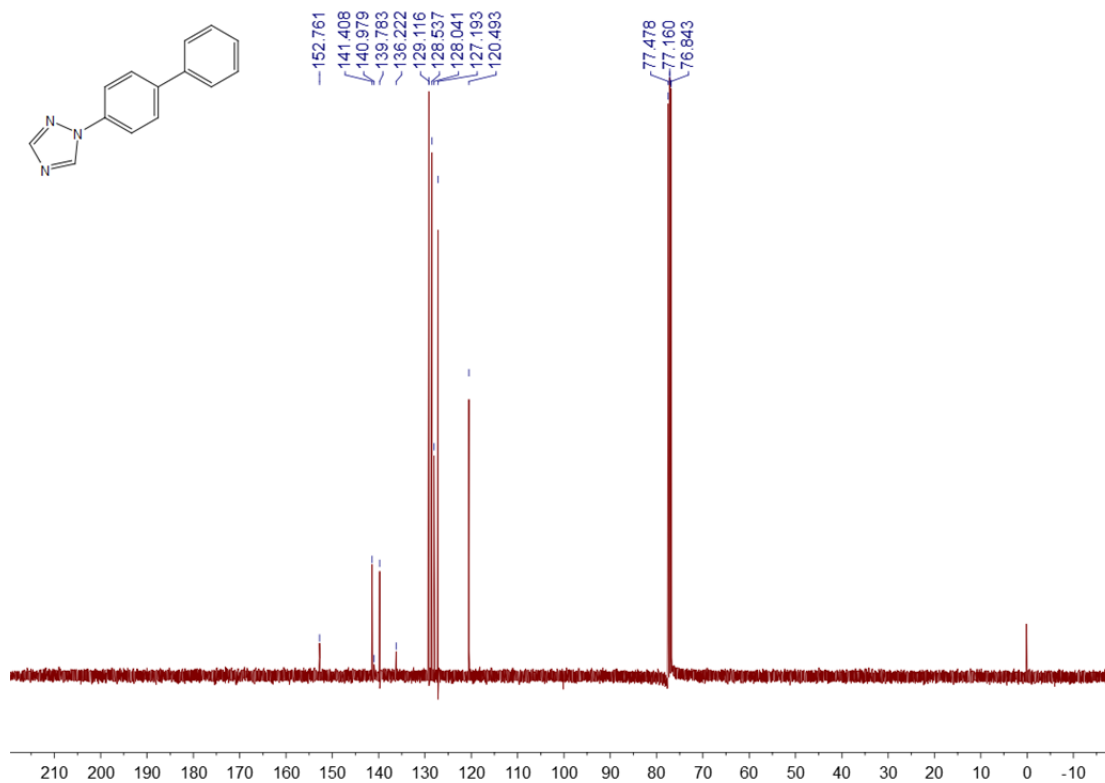

# 1-(4-(1H-1,2,4-Triazol-1-yl)phenyl)ethanone (3v)

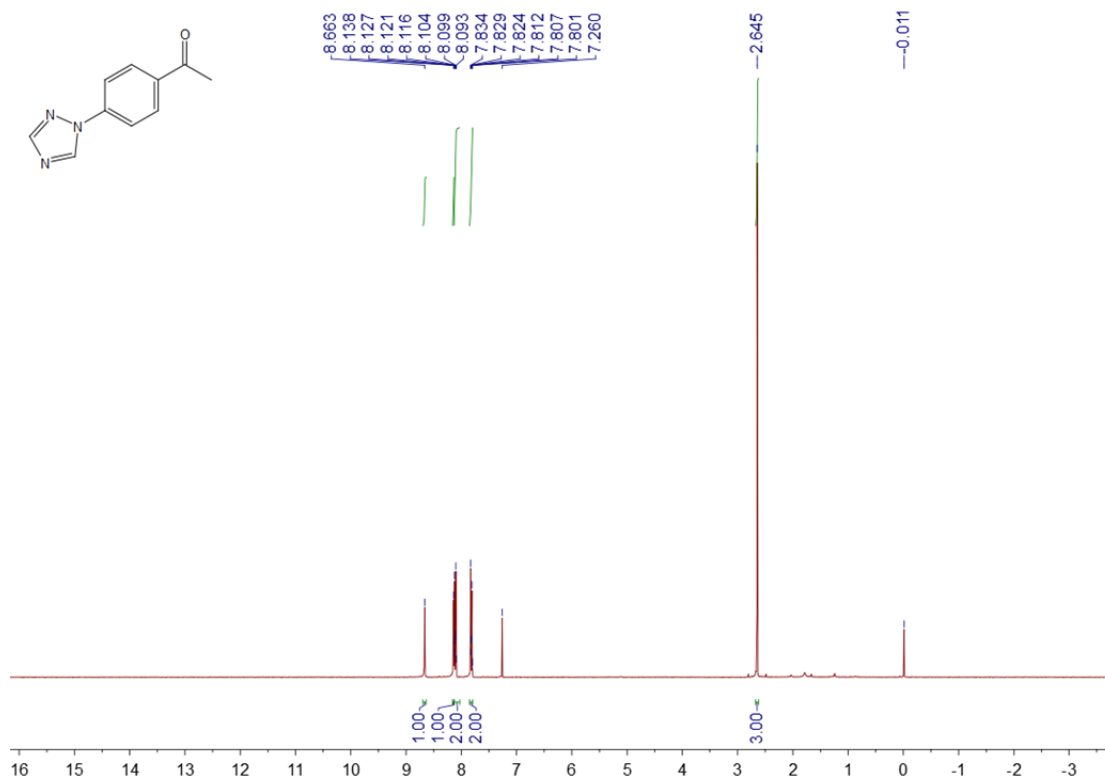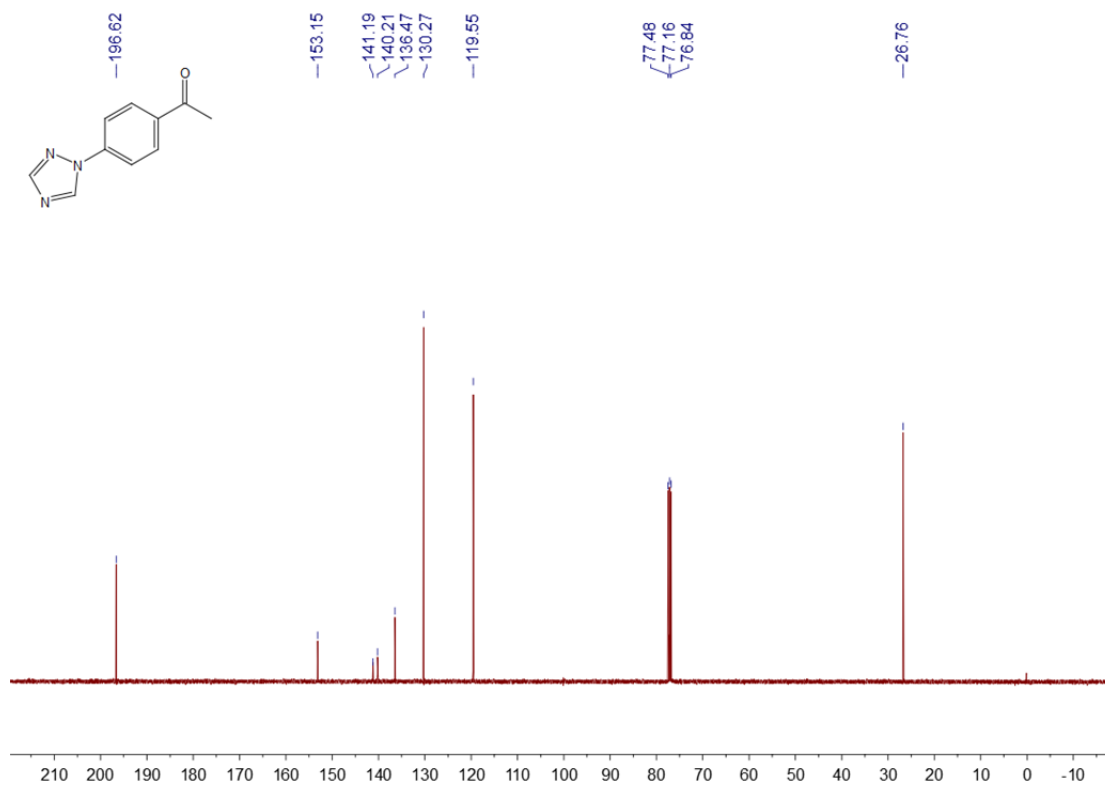

# 1-phenyl-1H-imidazole (3w)

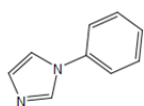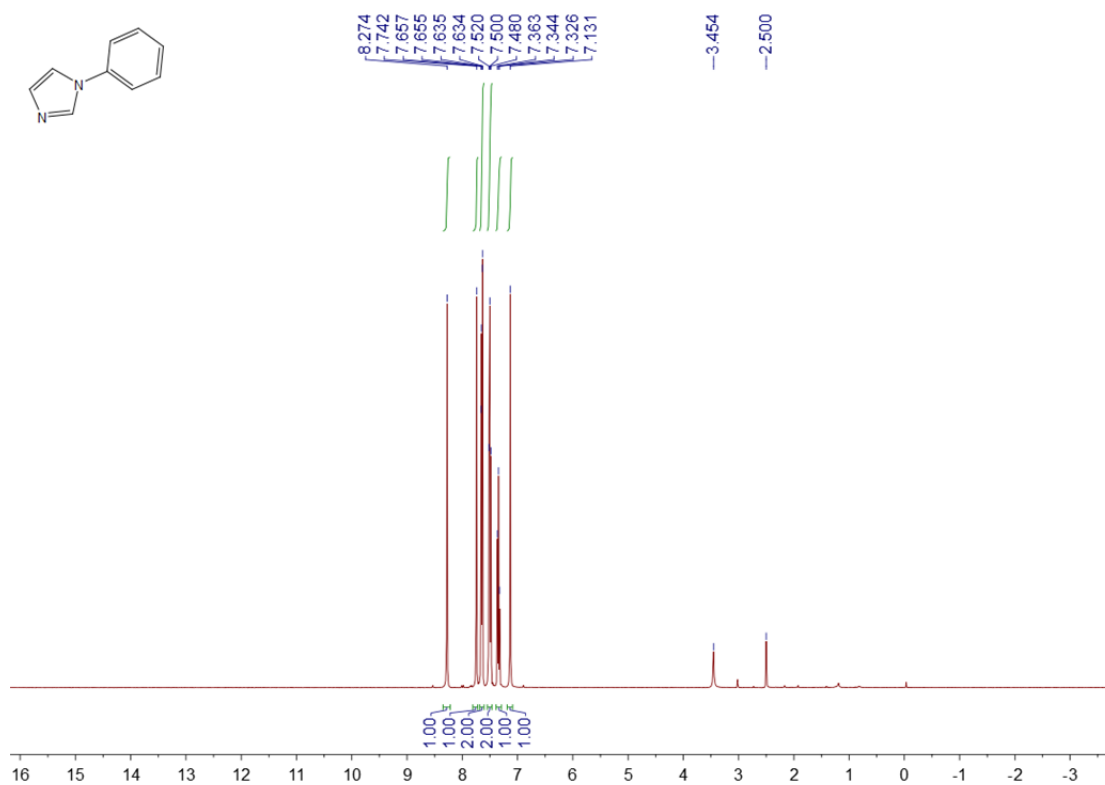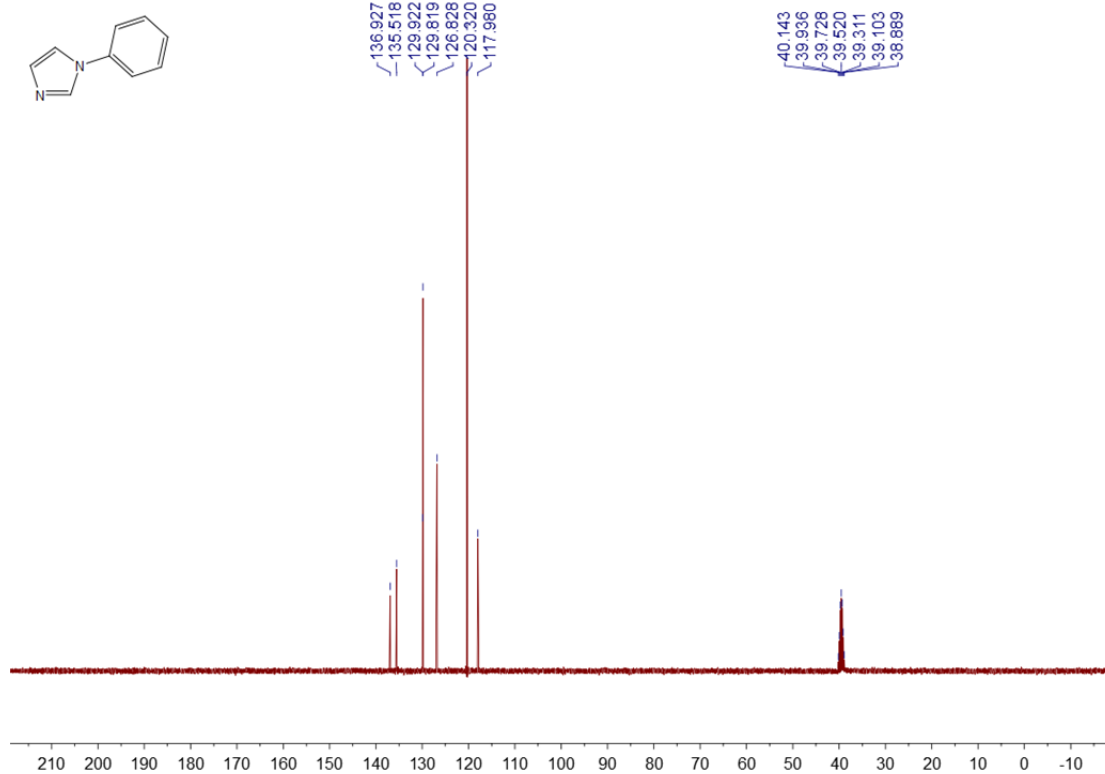

### 1-(*p*-Tolyl)-1*H*-imidazole (3x)

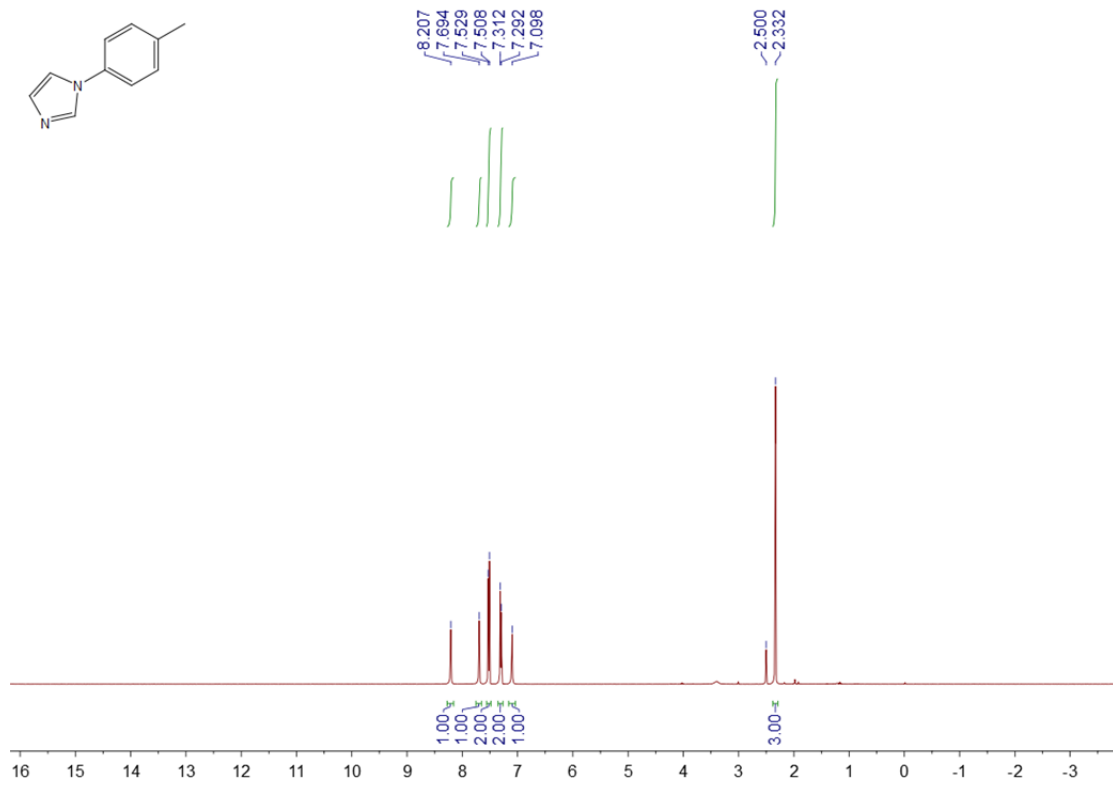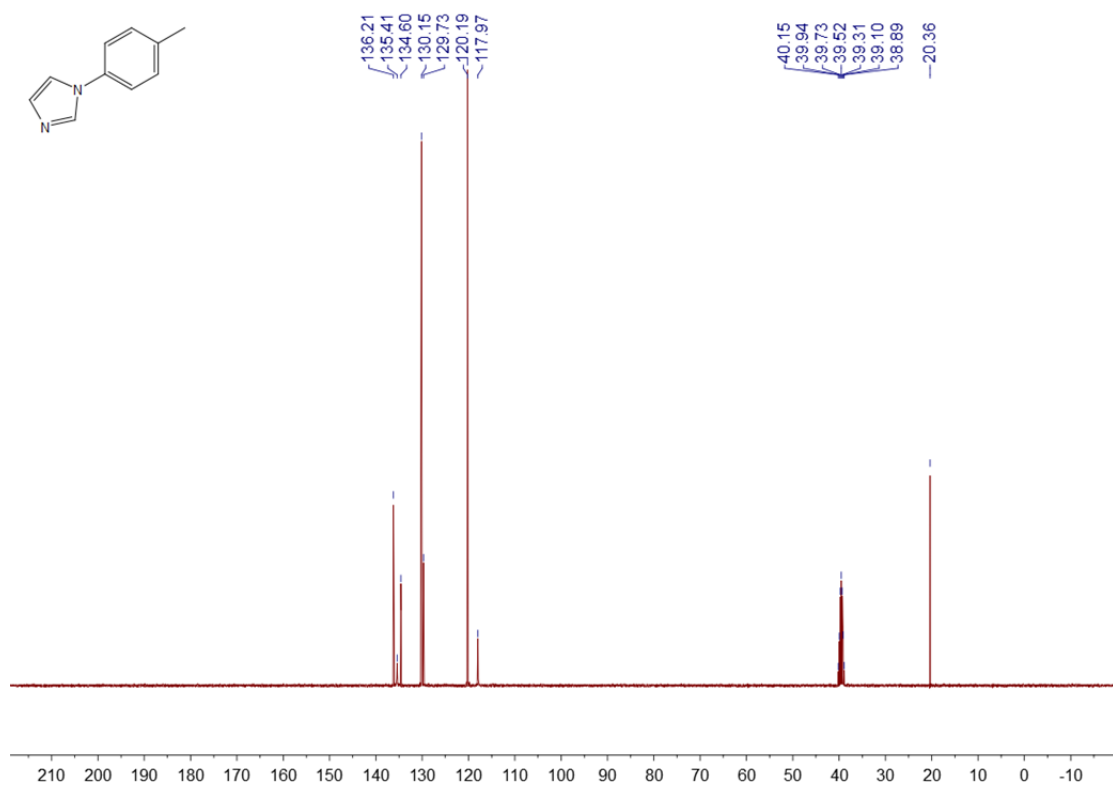

# 1-(4-Methoxyphenyl)-1H-imidazole (3y)

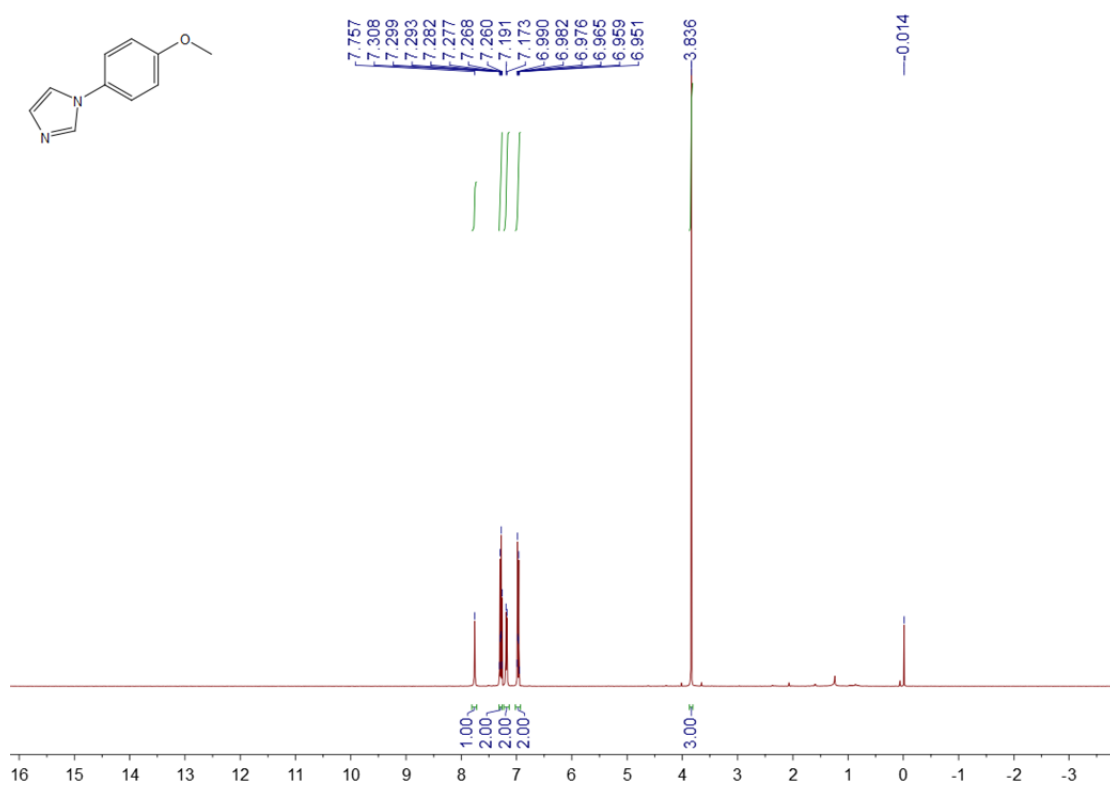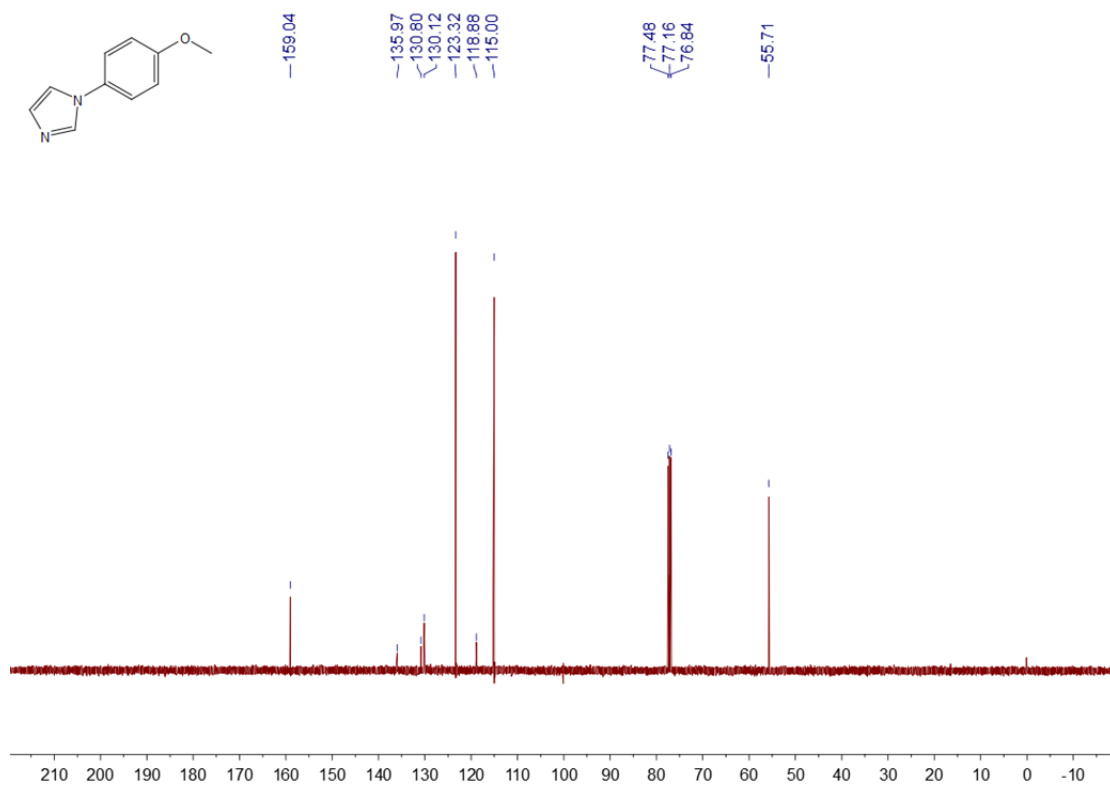

# 1-(4-Chlorophenyl)-1H-imidazole (3z)

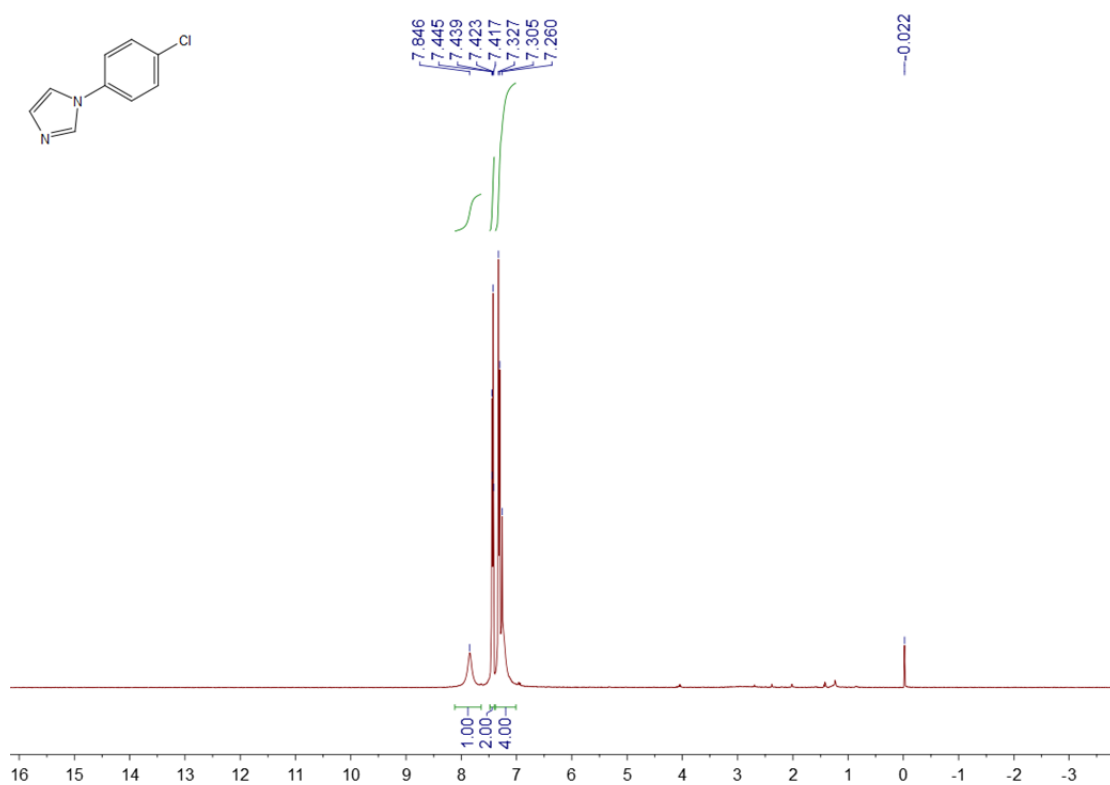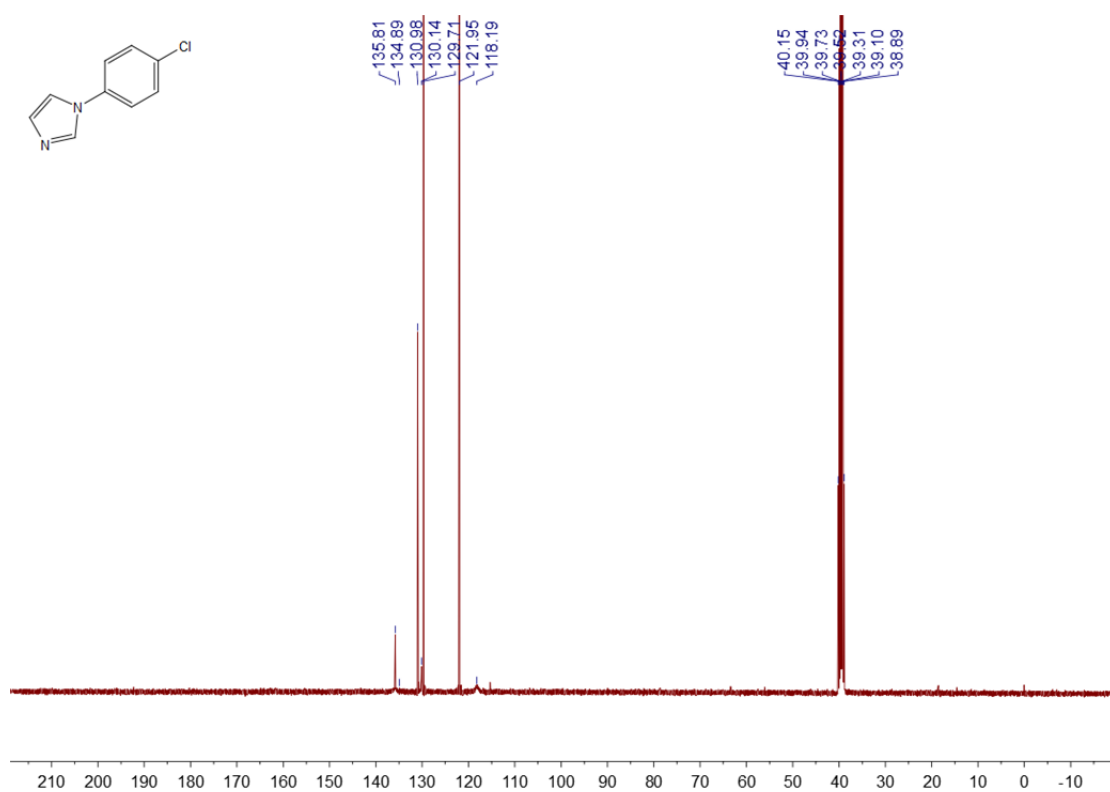

Supplement: c6ob02068b1.pdf [file c6ob02068b1.pdf]
